# Supplementary material for: New theropod (Tetanurae: Avetheropoda) material from the ‘mid’-Cretaceous Griman Greek Formation at Lightning Ridge, New South Wales, Australia
Source: PubMed Central journal article supplement (PMC6366187; doi:10.1098/rsos.180826), 2019-01-30
Supplement: rsos180826_review_history.pdf [file rsos180826_review_history.pdf]

## **New theropod (Tetanurae: Avetheropoda) material from the 'mid'-Cretaceous Griman Greek Formation at Lightning Ridge, New South Wales, Australia**

Tom Brougham, Elizabeth T. Smith and Phil R. Bell

### **Article citation details**

*R. Soc. open sci.* **6**: 180826.

<http://dx.doi.org/10.1098/rsos.180826>

### **Review timeline**

Original submission: 9 November 2017  
1st revised submission: 4 June 2018  
2nd revised submission: 16 November 2018  
Final acceptance: 17 December 2018

Note: Reports are unedited and appear as submitted by the referee. The review history appears in chronological order.

## Review History

RSOS-171832.R0 (Original submission)

Review form: Reviewer 1 (Fernando Novas)

**Is the manuscript scientifically sound in its present form?**

No

**Are the interpretations and conclusions justified by the results?**

No

**Is the language acceptable?**

Yes

**Is it clear how to access all supporting data?**

Yes

**Do you have any ethical concerns with this paper?**

No

## Have you any concerns about statistical analyses in this paper?

No

## Recommendation?

Reject

## Comments to the Author(s)

Dear Sir,

My comments on the ms of reference are as follows (these are the same comments inserted as notes in the corrected pdf):

1. GENERAL COMMENTS: With just few exceptions (e.g., Hocknull et al., 2009) Australian dinosaurs are extremely fragmentary. Present ms offers detailed description of deceptively fragmentary elements, which do not escape from this pervasive problem of the Australian Cretaceous record. In my view, the main epistemological problem related with Australian Cretaceous dinosaurs is that researchers (present and previous ones) use such fragmentary evidence as sole and enough support to coin new evolutionary and paleobiogeographic interpretations. Several papers have been published in recent years (e.g., Benson et al., 2012; Barrett, 2010) which are based on very poor facts. Surprisingly, these hypotheses counter information coming from Argentine Patagonia, a neighbour region of Australia which -up to now- offers the most comprehensive fossil record of Cretaceous dinosaurs for Gondwana. Moreover, such hypotheses counters the best preserved and most informative evidence coming from Australia itself! (Winton Fm.). Present ms unfortunately encase in the approach of using fragmentary material to arrive to provocative conclusions: carcharodontosaurids dominated Cretaceous faunas from Australia. Any of the bones here described offer anatomical information to warrant referral to this theropod subclade. Present authors seem reluctant to follow well-supported paleobiogeographic (i.e., Agnolín et al., 2010) and phylogenetic (e.g., Novas et al., 2013) conclusions into which new discoveries from Australia can be comfortably understood. Present ms gives credit to phylogenetic papers (e.g. Benson et al., 2012) that have been already criticised and its ideas dismissed on the basis of more reliable anatomical and phylogenetic analysis (e.g., Novas et al., 2013; Porfiri et al., 2014).
2. Authors express along the ms that "megaraptorids are allosauroids", However, several recent papers support megaraptoran theropods as part of a basal coelurosaurian radiation (e.g., Novas et al., 2013; Porfiri et al., 2014; Novas et al. 2016).
3. The main problem with the present paper is the fossil evidence on which systematic referral and evolutionary interpretations are made. Such fossil evidence consists in numerically scarce, anatomically isolated, and fragmentary preserved bones that, in my view, can not be referred beyond the level of Theropoda indet. No unique derived features can be identified in so fragmentary evidence, and even recognition of features is not warranty to refer such isolated pieces to any particular theropod subgroup.
4. Current available evidence support Megaraptoridae as basal coelurosaurs, not as members of Neovenatoridae. Present authors follow hypothesis published in 2010, instead of more robust analyses on Megaraptoridae relationships published in more recent years.
5. Please, cite: 1) Porfiri et al 2014, Porfiri, J.D., Novas, F.E., Calvo, J.O., Agnolin, F.L., Ezcurra, M.D. and Cerda, I.A. 2014. Juvenile specimen of Megaraptor (Dinosauria, Theropoda) sheds light about tyrannosauroid radiation. *Cretaceous Research* 51; 35-55. And 2) Novas, Agnolin and Aranciaga. 2016. "Phylogenetic relationships of the Cretaceous Gondwanan theropods Megaraptor and Australovenator: the evidence afforded by their manual anatomy". *Memoirs of Museum Victoria* 74: 49-61.
6. Recent analyses depict Megaraptidae as well nested within Tyrannosauroidea.
7. On page 2 authors say that "...fossil discoveries over the past decade, which, when coupled with more comprehensive theropod phylogenetic hypotheses, has yielded new insights into the

diversity of Cretaceous theropods in Australia". However, understanding of poorly documented Australian Cretaceous dinosaur faunas have been obscured by the recurrent (and wrong) view that they are related with Laurasian clades. In fact, Patagonian dinosaurs are key to understand the Australian record. Insights came not from "more comprehensive theropod phylogenetic hypotheses", but on the process of comparing eastern Gondwanan dinosaurs with those of western Gondwana.

8. On page 2 it is said: "The recognition of Megaraptora as a distinct clade of carcharodontosaurian theropods [15] allowed for the first time an unambiguous diagnosis of many problematic Australian theropod specimens". This statement is incorrect: first of all, megaraptorans are not carcharodontosaurians; second, mtc I of Rapator have been reinterpreted as a probable megaraptoran by Agnolín et al. (2010).

9. On page 3 authors state that the new fossils "highlights particular similarities with the carcharodontosaurian rich fauna of Patagonia". Let me clarify two aspects of this phrase: Lower and Upper Cretaceous theropod faunas from Patagonia include a high diversity of theropods, and probably abelisaurids are the most common. Carcharodontosaurids are recorded in Aptian through Cenomanian rocks. Besides, Cretaceous Cenomanian dinosaur faunas from Africa also include carcharodontosaurid remains, were they seem abundant, alongside with spinosaurids.

10. One of the problems with the present ms is that authors automatically assume that available bones belong to Theropoda. Australia yielded several ornithomimid remains, thus bones here presented require comparisons with these ornithomimids.

11. Authors defend that available bones belong to a single individual. What about the size of these three elements? They keep the same relative proportions seen in more complete allosauroid skeletons?

12. Authors pay special attention to silica deposition on bone surface. However, the almost straight veins of silica, most of which encounter at 90 degrees, suggest a diagenetic origin which do not correspond with the internal histological structure of the bone. In sharp contrast, in well-preserved theropod vertebrae the camera or camella are delimited by thin BONE laminae which do not encounter at 90 degrees. In sum, these are diagenetic crests of silica devoid of both anatomical and phylogenetic value.

13. Regarding on the camerate or camellate condition of theropod vertebrae, Porfiri et al (2014) said: "We demonstrate here that the pneumatic condition of the outer portion of the vertebrae is not uniformly present in the rest of the bone. Thus, studies on the internal structure of theropod vertebrae need to take into account this variation in the degree of pneumaticity, avoiding observations based on localized portions of the bone." Thus, the observed camellate condition in a minimal portion of the vertebra does not warrant the systematic reference of this bone either to Carcharodontosauridae or any other theropod group.

14. On page 10, authors say that "The subtriangular pubic peduncle of the ilium is similar in appearance to those of other partially preserved ilia from megaraptoran allosauroids." However, far from being "partially preserved", the ilia of both Aerosteon and Murusraptor (Coria and Currie 2016) are almost complete and anatomically highly informative. I recommend to compare the isolated bone fragment here described with the pubic pedicles of these two megaraptorans. Besides, let me discourage comparisons with the poorly preserved bone fragment interpreted by Bell et al. as a megaraptorid pubic pedicle.

15. Regarding the internal structure of the pubic pedicle let me ask if this element is massive and entirely devoid of internal structure? If this is true, then think about diagenetic processes affecting the original bone structure.

16. Authors use length/width ratio for the pubic pedicle as enough anatomical information to evaluate to which theropod group this isolated portion of ilium pertains. Nevertheless, I suggest caution with such simple proportions. Osborn (1917) described beautifully preserved Tyrannosaurus ilia in which variations in pubic pedicle proportions (in ventral view) become evident.

17. Authors say "LRF 3310-3312 can be confidently assigned to Carcharodontosauria". But there is

no confidence in referring these badly preserved elements beyond Theropoda.

18. It is also expressed that "Ingroup relations of LRF 3310–3312 within Carcharodontosauria are uncertain". Even accepting the interpretation that bones here described do not belong to Megaraptoridae, why they must be referred as to Carcharodontosauria? Why not another allosauroid or neovenatorid group?

19. On page 11, authors says that "The incomplete fossil record of basal carcharodontosaurids, incomplete and/or poor preservation of known taxa..., and a lack of comprehensive osteological studies of important and relatively complete carcharodontosaurian taxa (e.g. Giganotosaurus, Concavenator) precludes an accurate determination of the extent and development of axial and appendicular pneumaticity within Carcharodontosauria". Please, do not charge against these fossils and their respective descriptions as main causes forbidding the elucidation of Australian fossils. Bones here described are highly fragmentary and devoid of trustable anatomical information, and this is the reason they can't be confidently assigned to any theropod clade.

20. On page 13, it is established that "Therefore, LRF 972 most likely pertains to a theropod.". However, I invite to review this assignment after comparing this vertebra with anterior dorsals of ornithomimid dinosaurs. Please, take a look at Galton 1981 description on Dryosaurus.

21. In some parts of the ms, authors dedicate to describe the "state of art" of different aspects of theropod anatomy. On page 14, they analyse in some depth the systematic position of different avialan taxa. But these thoughts are irrelevant here, because they do not contribute to elucidate the taxonomic referral of the Australian bones.

22. In discussing the "Comments on Australian theropod diversity" I must remember that we have published a comprehensive review on the Cretaceous theropods from Australia (Novas et al. 2013). Although this reference is cited in the present ms, the hypotheses expressed in our paper are neither mentioned, supported or dismissed in the present ms.

23. Authors cite that "Spinosaurid and ceratosaurian theropods have been reported on the basis of isolated elements from the Early Cretaceous of Victoria [2,4,5]." But the purported presence in Australia of these two clades has been dismissed by Novas et al. 2013.

24. On page 18, authors express that " During the Cretaceous, abelisauroids inhabited the lower palaeolatitudes of Gondwana, which were characterised by warm and arid environments [21], whereas cooler conditions were experienced in Australia due to its relatively higher palaeolatitude. During the Cretaceous, abelisauroids inhabited the lower palaeolatitudes of Gondwana, which were characterised by warm and arid environments [21], whereas cooler conditions were experienced in Australia due to its relatively higher palaeolatitude". On this regard I must say that Gondwanan abelisauroids are recorded from low (i.e., Morocco, Egypt) through high (Santa Cruz Province, Patagonia, Argentina) paleolatitudes. This later location occupied a similar paleolatitude as Winton, Australia, for example.

25. I am prone to assume that Australia had different paleoenvironmental conditions with respect to other Gondwanan regions. However, my concern here is with paleolatitudes. I suggest present author to check if Australian fossil sites were or not at similar paleolatitudes of productive dinosaur localities in southern Patagonia.

26. As a conclusion, authors say "In summary, Australia's carcharodontosaurian-dominated theropod fauna bears the closest similarity to that of South America." Contrary to this assertion, available fossil record still suggests Australia as megaraptorid-dominated theropod fauna, by the way similar to Patagonia.

In sum, I consider the evidence presented in the ms as inconclusive and highly fragmentary as to propose novel interpretations on Australian dinosaur diversity.

Sincerely yours,

Fernando E. Novas

Museo Argentino de Ciencias Naturales, Buenos Aires

## Review form: Reviewer 2

**Is the manuscript scientifically sound in its present form?**

No

**Are the interpretations and conclusions justified by the results?**

No

**Is the language acceptable?**

Yes

**Is it clear how to access all supporting data?**

Not Applicable

**Do you have any ethical concerns with this paper?**

No

**Have you any concerns about statistical analyses in this paper?**

No

**Recommendation?**

Major revision is needed (please make suggestions in comments)

**Comments to the Author(s)**

The fossils are new, and the authors make some good points that suggest they may not belong to megaraptorans (unlike most previous theropod remains from Australia). The descriptive elements of the paper are largely publishable and are certainly well-written. The authors have done a good job with the breadth and precision of their comparisons.

On the other hand, I don't agree with the broader interpretations of significance as currently presented. To summarise, the authors seem to say that finding a non-megaraptoran carcharodontosaurian in Australia conflicts with some previous biogeography hypotheses, and suggests a 'Gondwana-like' (meaning, central/northern South America-like) faunal composition. There are two reasons why I disagree with this:

(1) Gondwana isn't homogeneous, and there is clear evidence for changes in the abundances of higher taxa with latitude. In particular, southern Australian and Antarctic assemblages are rich in small-bodied ornithischians, and poor in sauropods and abelisauroids. This is the claim of various previous works, and I don't think the authors' findings really conflict with that. But because they don't really discuss the hypotheses with sufficient nuance this is basically glossed over.

(2) Basically all large-bodied theropods found globally in the Early Cretaceous - early Late Cretaceous in both Laurasia and Gondwana are carcharodontosaurians (with a small smattering of spinosaurids). In fact, I suspect there are more species of carcharodontosaurians known from Laurasia than Gondwana. So it isn't right to say that finding carcharodontosaurians in Australia indicates 'Gondwanan signal'. At least, not in the absence of good information on their affinities within Carcharodontosauria,

(3) The idea of 'Gondwana signal' is vague, and doesn't take into account biogeographic processes like vicariance, dispersal, regional extinction, in situ diversification etc. This is important. Higher taxa (e.g. Carcharodontosauria) can have wide distributions due to ancient

origins, and this is somewhat independent of the more recent biogeographic events that cladistic biogeography attempts to estimate. Much of the authors perceived 'disagreements' with some previous work basically results from the absence of consideration of this.

So, basically I find that the authors are trying to make a 'big story' out of not enough evidence, and with great misrepresentation of previous hypotheses. I'd advocate just removing all this stuff and reporting the bones.

My detailed comments are below.

#### Abstract

"The newly expanded carcharodontosaurian fauna in Australia existed penecontemporaneously with the peak diversity of the clade in South America and demonstrates an increasingly Gondwana signal in Australia's theropod fauna".

The idea of 'Gondwanan signal' is vague in biogeographical terms. And the recognition of this based on the the occurrence of a non-megaraptoran carcharodontosaurians doesn't follow: non-megaraptoran carcharodontosaurians such as *Acrocanthosaurus*, *Neovenator*, and *Shaochilong* are known from Laurasia, plus *Concavenator*, *Siats*, the list goes on. This is important, because non-megaraptoran carcharodontosaurians essentially constitute nearly all large-bodied Early Cretaceous theropods from Laurasia. Early Cretaceous of Laurasia hasn't yielded many large-bodied theropod fossils. But this is basically good evidence that they were abundant there, and there is no basis to suggest that finding one in the Early Cretaceous of Australia contributes to biogeographic debates.

#### Introduction

"With respect to non-avian theropods, Cretaceous Australia appears to be dominated by megaraptorid allosauroids [3,8-11], with purported ceratosaurs, spinosaurids and coelurosaurs comprising a smaller proportion of the theropod diversity [2-4]"

It's not sufficient to say 'purported' and leave it hanging. For example, everyone agrees there are coelurosaurs or some sort or another surely? To me, also, the ceratosaur astragalus is decisive, Fitzgerald defended this in some detail and it hasn't been contested since. It's actually one of the more convincing identifications among the whole assemblage.

"The abundance of megaraptorids in both South America and Australia during the Late Cretaceous has been hypothesised to support a Gondwanan influence on the composition of Australia's theropod fauna during at least the Early Cretaceous. This sea is supported by recent palaeographic modelling...However, an alternative hypothesis suggests that a high diversity of theropods in southern Australia, including traditionally Laurasian forms such as dromaeosaurids and tyrannosauroids, resulted from the establishment of a global cosmopolitanism of theropods in the Early Cretaceous, followed by an episode of climate-driven cosmopolitanism".

>I don't really see these as 'alternative hypotheses' even some of the earliest work on Gondwanan biogeography (by Bonaparte and Bonaparte & Kielan-Jarowska) attributes some clades to ancient divergence during Pangean times and some to more recent, in situ events. Also, the occurrence of latitudinal zonation (your 'climate-driven cosmopolitanism') is not inconsistent with the idea that Australia has many 'Gondwana' clades. I believe that the idea is that higher taxa have essentially 'global' distributions, and their abundances within Gondwana/Laurasia could be related to climate. This would explain why southern Australia and

Antarctica have abundant small-bodied ornithischians, for example, and maybe why southern Australia has relatively abundant coelurosaurs remains compared to e.g. Patagonia and Brazil. Advocates of the 'Gondwana fauna' hypotheses more recently have tended to gloss over this in favour of a more simplistic view that all this stuff belongs to special Gondwana clades. To me, it doesn't make sense to assert this strong, end-member possibility at the expense of any nuance of complexity.

## Discussion

"The apparent bias of the Australian Cretaceous theropod record towards carcharodontosaurian theropods... has been presented as evidence for provincialism of Australia's theropod fauna [3,5]"

Neither of the cited references makes this assertion in the way it is framed here. Furthermore, statements later in the discussion imply that the above statement is incorrect. But in fact, they are all totally consistent with each other. It sounds like we basically all agree that megaraptorans particularly are strikingly abundant in Australia, consistent with some provincialism in terms of relative abundances, but inconsistent with the statement that carcharodontosaurians attained their "peak abundance in South America during the mid-late Cretaceous" (in fact, it is in the Early Cretaceous of Australia...), and consistent with the statement that "Australia played an active role in the evolution and radiation of Gondwanan megaraptorids."

"Abelisauroids, which formed a significant component of the theropod fauna of the mid-Late Cretaceous of South America, are conspicuously absent in Australia"

This is not correct Fitzgerald et al. (2012) suggested the debated astragalus to be a ceratosaur (with strong evidence) and possibly an abelisauroid. So it's hard to defend the statement from the manuscript that suggests there is positive evidence for the absence of abelisauroids. I certainly wouldn't say they were 'conspicuously absent'. And in fact, they don't become particularly abundant in South America until the Late Cretaceous. So they could easily be undetected at low levels of sampling as in Australia. All we really know is that they occurred at most, at low abundance in the southern Australian assemblage.

"It has also been proposed that Australia's Early Cretaceous theropod community originated in the southern part of Australia following a period of global theropod cosmopolitanism [2,3]"

This is a mis-reading of what those papers [2,3] proposed. The papers specifically discussed the composition of high-latitude assemblages in Australia, and did not say that this gave rise to the biota of lower latitudes. In fact, they seem to discuss the higher latitude assemblage as a separate entity. This also occurs in southern Patagonia and Antarctica, which are richer in small-bodied ornithischians (i.e. more similar to southern Australia) than other parts of South America [discussed in ref. 3].

"Furthermore, Australia appears to have played an active role in the evolution and radiation of Gondwanan megaraptorids, as opposed to acting as an endpoint in theropod geographic evolution [11]"

No-one has proposed that Australia "acted as an endpoint in theropod geographic evolution". This is a straw man.

"In summary, Australia's carcharodontosaurian-dominated theropod fauna bears the closest similarity to that of South America. Although its taxonomic position within Carcharodontosauria

cannot be constrained with certainty... further emphasises the influence of a 'Gondwanan' theropod fauna on Australia".

For reasons discussed at the start of this review, finding a carcharodontosaurian doesn't lend particular support either to Gondwanan or Laurasian 'affinities'.

## Decision letter (RSOS-171832.R0)

05-Jan-2018

Dear Mr Brougham:

Manuscript ID RSOS-171832 entitled "A carcharodontosaurian-dominated Australian theropod fauna from the mid-Cretaceous Grimman Creek Formation (Lightning Ridge, New South Wales)" which you submitted to Royal Society Open Science, has been reviewed. The comments from reviewers are included at the bottom of this letter.

In view of the criticisms of the reviewers, the manuscript has been rejected in its current form. However, a new manuscript may be submitted which takes into consideration these comments.

Please note that resubmitting your manuscript does not guarantee eventual acceptance, and that your resubmission will be subject to peer review before a decision is made.

You will be unable to make your revisions on the originally submitted version of your manuscript. Instead, revise your manuscript and upload the files via your author centre.

Once you have revised your manuscript, go to <https://mc.manuscriptcentral.com/rsos> and login to your Author Center. Click on "Manuscripts with Decisions," and then click on "Create a Resubmission" located next to the manuscript number. Then, follow the steps for resubmitting your manuscript.

Your resubmitted manuscript should be submitted by 05-Jul-2018. If you are unable to submit by this date please contact the Editorial Office.

Please note that Royal Society Open Science will introduce article processing charges for all new submissions received from 1 January 2018. Charges will also apply to papers transferred to Royal Society Open Science from other Royal Society Publishing journals, as well as papers submitted as part of our collaboration with the Royal Society of Chemistry (<http://rsos.royalsocietypublishing.org/chemistry>). If your manuscript is submitted and accepted for publication after 1 Jan 2018, you will be asked to pay the article processing charge, unless you request a waiver and this is approved by Royal Society Publishing. You can find out more about the charges at <http://rsos.royalsocietypublishing.org/page/charges>. Should you have any queries, please contact [openscience@royalsociety.org](mailto:openscience@royalsociety.org).

We look forward to receiving your resubmission.

Kind regards,  
Alice Power  
Editorial Coordinator  
Royal Society Open Science  
[openscience@royalsociety.org](mailto:openscience@royalsociety.org)



on behalf of Dr Robert Sansom (Associate Editor) and Jon Blundy (Subject Editor)  
 openscience@royalsociety.org

Associate Editor Comments to Author (Dr Robert Sansom):

We thank the authors for submission of this manuscript. We have now received two referee reports and both raise serious concerns regarding the manuscript as it stands. Both are of the opinion that the palaeobiogeographic interpretations and implications of the new finds stretch the available data too far and do not consider other contributing factors or information. The second reviewer is of the opinion that the material is so fragmentary as not to be able to support the interpretations made in the manuscript. If the manuscript could be updated to support those interpretations in light of the explicit synapomorphies that are and are not present in the material, broader reference was made to the alternative phylogenetic solutions raised by reviewer 2, consideration of a wider taxonomic scope of comparison as suggested by reviewer 2 (i.e. not just theropod), and each of the reviewers comments are responded to, then it might be possible to reconsider a resubmitted version of this manuscript for publication, pending further reviews.

Reviewers' Comments to Author:

Reviewer: 1

Comments to the Author(s)

Dear Sir,

My comments on the ms of reference are as follows (these are the same comments inserted as notes in the corrected pdf):

1. GENERAL COMMENTS: With just few exceptions (e.g., Hocknull et al., 2009) Australian dinosaurs are extremely fragmentary. Present ms offers detailed description of deceptively fragmentary elements, which do not escape from this pervasive problem of the Australian Cretaceous record. In my view, the main epistemological problem related with Australian Cretaceous dinosaurs is that researchers (present and previous ones) use such fragmentary evidence as sole and enough support to coin new evolutionary and paleobiogeographic interpretations. Several papers have been published in recent years (e.g., Benson et al., 2012; Barrett, 2010) which are based on very poor facts. Surprisingly, these hypotheses counter information coming from Argentine Patagonia, a neighbour region of Australia which -up to now- offers the most comprehensive fossil record of Cretaceous dinosaurs for Gondwana. Moreover, such hypotheses counters the best preserved and most informative evidence coming from Australia itself! (Winton Fm.). Present ms unfortunately encase in the approach of using fragmentary material to arrive to provocative conclusions: carcharodontosaurids dominated Cretaceous faunas from Australia. Any of the bones here described offer anatomical information to warrant referral to this theropod subclade. Present authors seem reluctant to follow well-supported paleobiogeographic (i.e., Agnolín et al., 2010) and phylogenetic (e.g., Novas et al., 2013) conclusions into which new discoveries from Australia can be comfortably understood. Present ms gives credit to phylogenetic papers (e.g, Benson et al., 2012) that have been already criticised and its ideas dismissed on the basis of more reliable anatomical and phylogenetic analysis (e.g., Novas et al., 2013; Porfiri et al., 2014).
2. Authors express along the ms that "megaraptorids are allosauroids", However, several recent papers support megaraptoran theropods as part of a basal coelurosaurian radiation (e.g., Novas et al., 2013; Porfiri et al., 2014; Novas et al. 2016).
3. The main problem with the present paper is the fossil evidence on which systematic referral and evolutionary interpretations are made. Such fossil evidence consists in numerically scarce, anatomically isolated, and fragmentary preserved bones that, in my view, can not be referred

beyond the level of Theropoda indet. No unique derived features can be identified in so fragmentary evidence, and even recognition of features is not warranty to refer such isolated pieces to any particular theropod subgroup.

4. Current available evidence support Megaraptoridae as basal coelurosaur, not as members of Neovenatoridae. Present authors follow hypothesis published in 2010, instead of more robust analyses on Megaraptoridae relationships published in more recent years.

5. Please, cite: 1) Porfiri et al 2014, Porfiri, J.D., Novas, F.E., Calvo, J.O., Agnolin, F.L., Ezcurra, M.D. and Cerda, I.A. 2014. Juvenile specimen of Megaraptor (Dinosauria, Theropoda) sheds light about tyrannosauroid radiation. *Cretaceous Research* 51; 35–55. And 2) Novas, Agnolin and Aranciaga. 2016. "Phylogenetic relationships of the Cretaceous Gondwanan theropods Megaraptor and Australovenator: the evidence afforded by their manual anatomy". *Memoirs of Museum Victoria* 74: 49–61.

6. Recent analyses depict Megaraptidae as well nested within Tyrannosauroidea.

7. On page 2 authors say that "...fossil discoveries over the past decade, which, when coupled with more comprehensive theropod phylogenetic hypotheses, has yielded new insights into the diversity of Cretaceous theropods in Australia". However, understanding of poorly documented Australian Cretaceous dinosaur faunas have been obscured by the recurrent (and wrong) view that they are related with Laurasian clades. In fact, Patagonian dinosaurs are key to understand the Australian record. Insights came not from "more comprehensive theropod phylogenetic hypotheses", but on the process of comparing eastern Gondwanan dinosaurs with those of western Gondwana.

8. On page 2 it is said: "The recognition of Megaraptora as a distinct clade of carcharodontosaurian theropods [15] allowed for the first time an unambiguous diagnosis of many problematic Australian theropod specimens". This statement is incorrect: first of all, megaraptorans are not carcharodontosaurians; second, mtc I of Rapator have been reinterpreted as a probable megaraptoran by Agnolín et al. (2010).

9. On page 3 authors state that the new fossils "highlights particular similarities with the carcharodontosaurian rich fauna of Patagonia.". Let me clarify two aspects of this phrase: Lower and Upper Cretaceous theropod faunas from Patagonia include a high diversity of theropods, and probably abelisaurids are the most common. Carcharodontosaurids are recorded in Aptian through Cenomanian rocks. Besides, Cretaceous Cenomanian dinosaur faunas from Africa also include carcharodontosaurid remains, were they seem abundant, alongside with spinosaurids.

10. One of the problems with the present ms is that authors automatically assume that available bones belong to Theropoda. Australia yielded several ornithomimid remains, thus bones here presented require comparisons with these ornithomimids.

11. Authors defend that available bones belong to a single individual. What about the size of these three elements? They keep the same relative proportions seen in more complete allosauroid skeletons?

12. Authors pay special attention to silica deposition on bone surface. However, the almost straight veins of silica, most of which encounter at 90 degrees, suggest a diagenetic origin which do not correspond with the internal histological structure of the bone. In sharp contrast, in well-preserved theropod vertebrae the camera or camella are delimited by thin BONE laminae which do not encounter at 90 degrees. In sum, these are diagenetic crests of silica devoid of both anatomical and phylogenetic value.

13. Regarding on the camerate or camellate condition of theropod vertebrae, Porfiri et al (2014) said: "We demonstrate here that the pneumatic condition of the outer portion of the vertebrae is not uniformly present in the rest of the bone. Thus, studies on the internal structure of theropod vertebrae need to take into account this variation in the degree of pneumaticity, avoiding observations based on localized portions of the bone." Thus, the observed camellate condition in a minimal portion of the vertebra does not warrant the systematic reference of this bone either to Carcharodontosauridae or any other theropod group.

14. On page 10, authors say that "The subtriangular pubic peduncle of the ilium is similar in appearance to those of other partially preserved ilia from megaraptoran allosauroids." However, far from being "partially preserved", the ilia of both *Aerosteon* and *Murusraptor* (Coria and Currie 2016) are almost complete and anatomically highly informative. I recommend to compare the isolated bone fragment here described with the pubic pedicles of these two megaraptorans. Besides, let me discourage comparisons with the poorly preserved bone fragment interpreted by Bell et al. as a megaraptorid pubic pedicle.

15. Regarding the internal structure of the pubic pedicle let me ask if this element is massive and entirely devoid of internal structure? If this is true, then think about diagenetic processes affecting the original bone structure.

16. Authors use length/width ratio for the pubic pedicle as enough anatomical information to evaluate to which theropod group this isolated portion of ilium pertains. Nevertheless, I suggest caution with such simple proportions. Osborn (1917) described beautifully preserved *Tyrannosaurus* ilia in which variations in pubic pedicle proportions (in ventral view) become evident.

17. Authors say "LRF 3310–3312 can be confidently assigned to Carcharodontosauria". But there is no confidence in referring these badly preserved elements beyond Theropoda.

18. It is also expressed that "Ingroup relations of LRF 3310–3312 within Carcharodontosauria are uncertain". Even accepting the interpretation that bones here described do not belong to Megaraptoridae, why they must be referred as to Carcharodontosauria? Why not another allosauroid or neovenatorid group?

19. On page 11, authors say that "The incomplete fossil record of basal carcharodontosaurids, incomplete and/or poor preservation of known taxa..., and a lack of comprehensive osteological studies of important and relatively complete carcharodontosaurian taxa (e.g. *Giganotosaurus*, *Concavenator*) precludes an accurate determination of the extent and development of axial and appendicular pneumaticity within Carcharodontosauria". Please, do not charge against these fossils and their respective descriptions as main causes forbidding the elucidation of Australian fossils. Bones here described are highly fragmentary and devoid of trustable anatomical information, and this is the reason they can't be confidently assigned to any theropod clade.

20. On page 13, it is established that "Therefore, LRF 972 most likely pertains to a theropod.". However, I invite to review this assignment after comparing this vertebra with anterior dorsals of ornithomimid dinosaurs. Please, take a look at Galton 1981 description on *Dryosaurus*.

21. In some parts of the ms, authors dedicate to describe the "state of art" of different aspects of theropod anatomy. On page 14, they analyse in some depth the systematic position of different avialan taxa. But these thoughts are irrelevant here, because they do not contribute to elucidate the taxonomic referral of the Australian bones.

22. In discussing the "Comments on Australian theropod diversity" I must remember that we have published a comprehensive review on the Cretaceous theropods from Australia (Novas et al. 2013). Although this reference is cited in the present ms, the hypotheses expressed in our paper are neither mentioned, supported or dismissed in the present ms.

23. Authors cite that "Spinosaurid and ceratosaurian theropods have been reported on the basis of isolated elements from the Early Cretaceous of Victoria [2,4,5]." But the purported presence in Australia of these two clades has been dismissed by Novas et al. 2013.

24. On page 18, authors express that "During the Cretaceous, abelisauroids inhabited the lower palaeolatitudes of Gondwana, which were characterised by warm and arid environments [21], whereas cooler conditions were experienced in Australia due to its relatively higher palaeolatitude. During the Cretaceous, abelisauroids inhabited the lower palaeolatitudes of Gondwana, which were characterised by warm and arid environments [21], whereas cooler conditions were experienced in Australia due to its relatively higher palaeolatitude". On this regard I must say that Gondwanan abelisauroids are recorded from low (i.e., Morocco, Egypt) through high (Santa Cruz Province, Patagonia, Argentina)

paleolatitudes. This later location occupied a similar paleolatitude as Winton, Australia, for example.

25. I am prone to assume that Australia had different paleoenvironmental conditions with respect to other Gondwanan regions. However, my concern here is with paleolatitudes. I suggest present author to check if Australian fossil sites were or not at similar paleolatitudes of productive dinosaur localities in southern Patagonia.

26. As a conclusion, authors say "In summary, Australia's carcharodontosaurian-dominated theropod fauna bears the closest similarity to that of South America." Contrary to this assertion, available fossil record still suggests Australia as megaraptorid-dominated theropod fauna, by the way similar to Patagonia.

In sum, I consider the evidence presented in the ms as inconclusive and highly fragmentary as to propose novel interpretations on Australian dinosaur diversity.

Sincerely yours,

Fernando E. Novas

Museo Argentino de Ciencias Naturales, Buenos Aires

Reviewer: 2

Comments to the Author(s)

The fossils are new, and the authors make some good points that suggest they may not belong to megaraptorans (unlike most previous theropod remains from Australia). The descriptive elements of the paper are largely publishable and are certainly well-written. The authors have done a good job with the breadth and precision of their comparisons.

On the other hand, I don't agree with the broader interpretations of significance as currently presented. To summarise, the authors seem to say that finding a non-megaraptoran carcharodontosaurian in Australia conflicts with some previous biogeography hypotheses, and suggests a 'Gondwana-like' (meaning, central/northern South America-like) faunal composition. There are two reasons why I disagree with this:

(1) Gondwana isn't homogeneous, and there is clear evidence for changes in the abundances of higher taxa with latitude. In particular, southern Australian and Antarctic assemblages are rich in small-bodied ornithischians, and poor in sauropods and abelisauroids. This is the claim of various previous works, and I don't think the authors' findings really conflict with that. But because they don't really discuss the hypotheses with sufficient nuance this is basically glossed over.

(2) Basically all large-bodied theropods found globally in the Early Cretaceous - early Late Cretaceous in both Laurasia and Gondwana are carcharodontosaurians (with a small smattering of spinosaurids). In fact, I suspect there are more species of carcharodontosaurians known from Laurasia than Gondwana. So it isn't right to say that finding carcharodontosaurians in Australia indicates 'Gondwanan signal'. At least, not in the absence of good information on their affinities within Carcharodontosauria,

(3) The idea of 'Gondwana signal' is vague, and doesn't take into account biogeographic processes like vicariance, dispersal, regional extinction, in situ diversification etc. This is important. Higher taxa (e.g. Carcharodontosauria) can have wide distributions due to ancient origins, and this is somewhat independent of the more recent biogeographic events that cladistic biogeography attempts to estimate. Much of the authors perceived 'disagreements' with some previous work basically results from the absence of consideration of this.

So, basically I find that the authors are trying to make a 'big story' out of not enough evidence, and with great misrepresentation of previous hypotheses. I'd advocate just removing all this stuff and reporting the bones.

My detailed comments are below.

#### Abstract

"The newly expanded carcharodontosaurian fauna in Australia existed penecontemporaneously with the peak diversity of the clade in South America and demonstrates an increasingly Gondwana signal in Australia's theropod fauna".

The idea of 'Gondwanan signal' is vague in biogeographical terms. And the recognition of this based on the the occurrence of a non-megaraptoran carcharodontosaurians doesn't follow: non-megaraptoran carcharodontosaurians such as *Acrocanthosaurus*, *Neovenator*, and *Shaochilong* are known from Laurasia, plus *Concavenator*, *Siats*, the list goes on. This is important, because non-megaraptoran carcharodontosaurians essentially constitute nearly all large-bodied Early Cretaceous theropods from Laurasia. Early Cretaceous of Laurasia hasn't yielded many large-bodied theropod fossils. But this is basically good evidence that they were abundant there, and there is no basis to suggest that finding one in the Early Cretaceous of Australia contributes to biogeographic debates.

#### Introduction

"With respect to non-avian theropods, Cretaceous Australia appears to be dominated by megaraptorid allosauroids [3,8-11], with purported ceratosaurs, spinosaurids and coelurosaurs comprising a smaller proportion of the theropod diversity [2-4]"

It's not sufficient to say 'purported' and leave it hanging. For example, everyone agrees there are coelurosaurs or some sort or another surely? To me, also, the ceratosaur astragalus is decisive, Fitzgerald defended this in some detail and it hasn't been contested since. It's actually one of the more convincing identifications among the whole assemblage.

"The abundance of megaraptorids in both South America and Australia during the Late Cretaceous has been hypothesised to support a Gondwanan influence on the composition of Australia's theropod fauna during at least the Early Cretaceous. This sea is supported by recent palaeographic modelling...However, an alternative hypothesis suggests that a high diversity of theropods in southern Australia, including traditionally Laurasian forms such as dromaeosaurids and tyrannosauroids, resulted from the establishment of a global cosmopolitanism of theropods in the Early Cretaceous, followed by an episode of climate-driven cosmopolitanism".

>I don't really see these as 'alternative hypotheses' even some of the earliest work on Gondwanan biogeography (by Bonaparte and Bonaparte & Kielan-Jarowska) attributes some clades to ancient divergence during Pangean times and some to more recent, in situ events. Also, the occurrence of latitudinal zonation (your 'climate-driven cosmopolitanism') is not inconsistent with the idea that Australia has many 'Gondwana' clades. I believe that the idea is that higher taxa have essentially 'global' distributions, and their abundances within

Gondwana/Laurasia could be related to climate. This would explain why southern Australia and Antarctica have abundant small-bodied ornithischians, for example, and maybe why southern Australia has relatively abundant coelurosaurs remains compared to e.. Patagonia and Brazil. Advocates of the 'Gondwana fauna' hypotheses more recently have tended to gloss over this in favour of a more simplistic view that all this stuff belongs to special Gondwana clades. To me, it doesn't make sense to assert this strong, end-member possibility at the expense of any nuance of complexity.

## Discussion

"The apparent bias of the Australian Cretaceous theropod record towards carcharodontosaurian theropods... has been presented as evidence for provincialism of Australia's theropod fauna [3,5]"

Neither of the cited references makes this assertion in the way it is framed here. Furthermore, statements later in the discussion imply that the above statement is incorrect. But in fact, they are all totally consistent with each other. It sounds like we basically all agree that megaraptorans particularly are strikingly abundant in Australia, consistent with some provincialism in terms of relative abundances, but inconsistent with the statement that carcharodontosaurians attained their "peak abundance in South America during the mid-late Cretaceous" (in fact, it is in the Early Cretaceous of Australia...), and consistent with the statement that "Australia played an active role in the evolution and radiation of Gondwanan megaraptorids."

"Abelisauroids, which formed a significant component of the theropod fauna of the mid-Late Cretaceous of South America, are conspicuously absent in Australia"

This is not correct Fitzgerald et al. (2012) suggested the debated astragalus to be a ceratosaur (with strong evidence) and possibly an abelisauroid. So it's hard to defend the statement from the manuscript that suggests there is positive evidence for the absence of abelisauroids. I certainly wouldn't say they were 'conspicuously absent'. And in fact, they don't become particularly abundant in South America until the Late Cretaceous. So they could easily be undetected at low levels of sampling as in Australia. All we really know is that they occurred at most, at low abundance in the southern Australian assemblage.

"It has also been proposed that Australia's Early Cretaceous theropod community originated in the southern part of Australia following a period of global theropod cosmopolitanism [2,3]"

This is a mis-reading of what those papers [2,3] proposed. The papers specifically discussed the composition of high-latitude assemblages in Australia, and did not say that this gave rise to the biota of lower latitudes. In fact, they seem to discuss the higher latitude assemblage as a separate entity. This also occurs in southern Patagonia and Antarctica, which are richer in small-bodied ornithischians (i.e. more similar to southern Australia) than other parts of South America [discussed in ref. 3].

"Furthermore, Australia appears to have played an active role in the evolution and radiation of Gondwanan megaraptorids, as opposed to acting as an endpoint in theropod geographic evolution [11]"

No-one has proposed that Australia “acted as an endpoint in theropod geographic evolution”. This is a straw man.

“In summary, Australia’s carcharodontosaurian-dominated theropod fauna bears the closest similarity to that of South America. Although its taxonomic position within Carcharodontosauria cannot be constrained with certainty... further emphasises the influence of a ‘Gondwanan’ theropod fauna on Australia”.

For reasons discussed at the start of this review, finding a carcharodontosaurian doesn’t lend particular support either to Gondwanan or Laurasian ‘affinities’.

## Author's Response to Decision Letter for (RSOS-171832.R0)

See Appendix A.

## RSOS-180826.R0

### Review form: Reviewer 1 (Fernando Novas)

**Is the manuscript scientifically sound in its present form?**

No

**Are the interpretations and conclusions justified by the results?**

No

**Is the language acceptable?**

Yes

**Is it clear how to access all supporting data?**

Yes

**Do you have any ethical concerns with this paper?**

No

**Have you any concerns about statistical analyses in this paper?**

No

**Recommendation?**

Major revision is needed (please make suggestions in comments)

**Comments to the Author(s)**

New carcharodontosaurian theropod remains from the mid-Cretaceous Griman Creek Formation, Lightning Ridge (New South Wales, Australia)

1. Present paper is well presented, materials are well described and compared, and bibliography

is updated. However, the methodological approach has some discussable aspects: first, the fragmentary preservation of the scarce available bones constitute a serious obstacle for firm taxonomic referral; 2) novel conclusions on theropod faunal composition presented by the authors are based on fragmentary and poorly informative bones; 3) main taxonomic, phylogenetic and paleobiogeographic conclusions are framed within interpretations made by Benson et al. 2010, which analysed character data and theropod taxa in a partial way, overlooking apomorphic similarities that megaraptorans share with coelurosaurs in general, and tyrannosauroids in particular. In sum, present paper, in my view, reports on new theropod remains which neither amplify nor modify current interpretations on the taxonomic composition of theropod Cretaceous faunas from Australia.

2. When referring to Patagonian theropod faunas, let me suggest something like: "...at roughly the same palaeolatitude, which hosted a diverse range of abelisaurids, alongside carcharodontosaurids and megaraptorids". The reason of this change in the phrase is that in Patagonia the numerically dominant theropods (in the lapse Aptian through Turonian) are abelisaurids, being seconded by carcharodontosaurids and megaraptorids (in this order). Thus, the main difference between Australia and Patagonia is the predominance of megaraptorids in the first continent, vs abelisaurids in the second one (currently unrecorded in Australia).

3. The use of "carcharodontosaurian" to describe the Australian theropod faunas is misleading, and I emphatically recommend dismiss its use (based on what we currently know about Australia fossil record). The reasons are two: first, megaraptorids are, by far, the most frequently found theropods in Australia; second, the term "carcharodontosaurian" that is used to gather carcharodontosaurids plus megaraptorids, is by following Benson et al 2010, a hypothesis that is weaker than that depicting megaraptorids as coelurosaurs (as detailed in Novas et al., 2013, Porfiri et al. 2014, and more recently by a different crew leaded by Porfiri et al. 2018).

4. The systematic framework, as here exposed, arbitrarily takes part for an already contested hypothesis on megaraptoran relationships. Present authors do not follow alternative hypotheses (i.e., Novas et al., 2013; Porfiri et al., 2014, 2018) based on a wrong argument: they state about the necessity to "incorporate a broader sampling of basal tetanurans and basal coelurosaurs characters and taxa is required before either hypothesis can be accepted over the current consensus view". But we have ALREADY DID this task! In Novas et al. 2013 paper, we incorporated a broader sampling than that presented by Benson, by merging two comprehensive datasets: the one by Benson et al. 2010 on basal tetanurans, and the one by Brusatte et al. 2010 on tyrannosauroids. With the incorporation of these later theropods the results got were substantially different from those exposed by Benson et al 2010. In other words, present authors counters their own proposal to "incorporate a broader sampling of characters and taxa", by choosing the more restrictive dataset (i.e., Benson's dataset). By the way, the same criticism applies for Brusatte and Carr (2016; ref 52 of the present ms), who overlooked our methodological approach. Finally, it is clear that there is no "current consensus" that megaraptorans are neovenatorid carcharodontosaurians: a recent paper by Porfiri et al. 2018 (a different working group that mine) concluded that megaraptorans are coelurosaurs, demonstrating, again, that the old idea that megaraptorans are allosauroids has not the best support.

5. Countering present authors, the evidence presented here is ambiguous -at least- to support referral to Allosauroidea and Carcharodontosauria / Carcharodontosauridae. The available bones can be also referred to Megaraptoridae, based on morphology, being in accordance with previous discoveries of the same group of theropods in the same fossil site as well as other sites in Australia.

6. I strongly discourage determination of the kind and degree of internal structure of vertebra just observing limited (and not analogous) portions of a vertebra. To get reliable information on this



yet poorly known aspect of theropod anatomy, it is needed to make comparisons based on equivalent cross-section planes. Porfiri et al 2014 called attention on this aspect by documenting the presence of camerate and camellate conditions in different parts of a single dorsal centrum of Megaraptor.

7. The Patagonian megaraptorid *Orkoraptor* has a keel on the ventral side of proximal caudal centra. This feature was neither described nor illustrated in its original paper (Novas et al. 2008), but I can provide the authors with images of the vertebra showing this feature. A ventral keel of this kind is also present in a mid-caudal of *Aerosteon*.

8. This length/width ratio applies to many basal tetanurans, including *Allosaurus*, *Giganotosaurus*, *Aerosteon*, *Anyksosaurus*, *Juratyran*. Thus, it does not appear to diagnose a particular tetanuran clade.

9. Based on the comments made above on each of the three listed features, I must conclude that they do not conform a set of characters "commonly found" among carcharodontosaurians, but among basal tetanurans. Again: the problem is not with characters but with the limited factual evidence to discern to which particular taxonomic group they belong.

10. Unfortunately, the evidence yielded from this fossil site is not decisive to certify the presence of a theropod group other than already described megaraptorids.

Fernando E. Novas  
Principal Researcher Conicet  
Head Laboratory of Comparative Anatomy  
Museo Argentino de Ciencias Naturales, Buenos Aires  
Argentina

## Review form: Reviewer 3 (Federico Agnolin)

**Is the manuscript scientifically sound in its present form?**

Yes

**Are the interpretations and conclusions justified by the results?**

Yes

**Is the language acceptable?**

Yes

**Is it clear how to access all supporting data?**

Yes

**Do you have any ethical concerns with this paper?**

No

**Have you any concerns about statistical analyses in this paper?**

Yes

**Recommendation?**

Accept with minor revision (please list in comments)

**Comments to the Author(s)**

Dear Authors and Editor,

I congratulate the authors for such a well-written and concise article. This MS contributes to the knowledge of the still poorly known and enigmatic theropod faunas from Australia. I have some concerns about the identification of the material and the features sustaining it. I think that authors should improve comparisons with carcharodontosaurids and megaraptorans. I include some brief comments in this regard within the PDF that I am attaching (Appendix B).

All the best,

Federico AGnolin

**Decision letter (RSOS-180826.R0)**

21-Sep-2018

Dear Mr Brougham,

The Subject Editor assigned to your paper ("New carcharodontosaurian theropod remains from the mid-Cretaceous Griman Creek Formation, Lightning Ridge (New South Wales, Australia)") has now received comments from reviewers. We would like you to revise your paper in accordance with the referee and Associate Editor suggestions which can be found below (not including confidential reports to the Editor). Please note this decision does not guarantee eventual acceptance.

Please submit a copy of your revised paper before 14-Oct-2018. Please note that the revision deadline will expire at 00.00am on this date. If we do not hear from you within this time then it will be assumed that the paper has been withdrawn. In exceptional circumstances, extensions may be possible if agreed with the Editorial Office in advance. We do not allow multiple rounds of revision so we urge you to make every effort to fully address all of the comments at this stage. If deemed necessary by the Editors, your manuscript will be sent back to one or more of the original reviewers for assessment. If the original reviewers are not available we may invite new reviewers.

To revise your manuscript, log into <http://mc.manuscriptcentral.com/rsos> and enter your Author Centre, where you will find your manuscript title listed under "Manuscripts with Decisions." Under "Actions," click on "Create a Revision." Your manuscript number has been appended to denote a revision. Revise your manuscript and upload a new version through your Author Centre.

When submitting your revised manuscript, you must respond to the comments made by the referees and upload a file "Response to Referees" in "Section 6 - File Upload". Please use this to document how you have responded to each of the comments, and the adjustments you have made. In order to expedite the processing of the revised manuscript, please be as specific as possible in your response.

In addition to addressing all of the reviewers' and editor's comments please also ensure that your revised manuscript contains the following sections before the reference list:

- Ethics statement

If your study uses humans or animals please include details of the ethical approval received, including the name of the committee that granted approval. For human studies please also detail

whether informed consent was obtained. For field studies on animals please include details of all permissions, licences and/or approvals granted to carry out the fieldwork.

- Data accessibility

It is a condition of publication that all supporting data are made available either as supplementary information or preferably in a suitable permanent repository. The data accessibility section should state where the article's supporting data can be accessed. This section should also include details, where possible of where to access other relevant research materials such as statistical tools, protocols, software etc can be accessed. If the data has been deposited in an external repository this section should list the database, accession number and link to the DOI for all data from the article that has been made publicly available. Data sets that have been deposited in an external repository and have a DOI should also be appropriately cited in the manuscript and included in the reference list.

If you wish to submit your supporting data or code to Dryad (<http://datadryad.org/>), or modify your current submission to dryad, please use the following link:  
<http://datadryad.org/submit?journalID=RSOS&manu=RSOS-180826>

- Competing interests

Please declare any financial or non-financial competing interests, or state that you have no competing interests.

- Authors' contributions

All submissions, other than those with a single author, must include an Authors' Contributions section which individually lists the specific contribution of each author. The list of Authors should meet all of the following criteria; 1) substantial contributions to conception and design, or acquisition of data, or analysis and interpretation of data; 2) drafting the article or revising it critically for important intellectual content; and 3) final approval of the version to be published.

All contributors who do not meet all of these criteria should be included in the acknowledgements.

We suggest the following format:

AB carried out the molecular lab work, participated in data analysis, carried out sequence alignments, participated in the design of the study and drafted the manuscript; CD carried out the statistical analyses; EF collected field data; GH conceived of the study, designed the study, coordinated the study and helped draft the manuscript. All authors gave final approval for publication.

- Acknowledgements

Please acknowledge anyone who contributed to the study but did not meet the authorship criteria.

- Funding statement

Please list the source of funding for each author.

Please note that Royal Society Open Science charge article processing charges for all new submissions that are accepted for publication. Charges will also apply to papers transferred to Royal Society Open Science from other Royal Society Publishing journals, as well as papers submitted as part of our collaboration with the Royal Society of Chemistry (<http://rsos.royalsocietypublishing.org/chemistry>). If your manuscript is newly submitted and subsequently accepted for publication, you will be asked to pay the article processing charge, unless you request a waiver and this is approved by Royal Society Publishing. You can find out

more about the charges at <http://rsos.royalsocietypublishing.org/page/charges>. Should you have any queries, please contact [openscience@royalsociety.org](mailto:openscience@royalsociety.org).

Once again, thank you for submitting your manuscript to Royal Society Open Science and I look forward to receiving your revision. If you have any questions at all, please do not hesitate to get in touch.

Kind regards,  
 Royal Society Open Science Editorial Office  
 Royal Society Open Science  
[openscience@royalsociety.org](mailto:openscience@royalsociety.org)

on behalf of Dr Robert Sansom (Associate Editor) and Prof. Jon Blundy (Subject Editor)  
[openscience@royalsociety.org](mailto:openscience@royalsociety.org)

Associate Editor Comments to Author (Dr Robert Sansom):

Associate Editor

Comments to the Author:

The authors have taken care and attention to address the first round of reviewers and the resulting MS is much improved. In response to this revised MS, reviewer 2 raises some minor concerns which should be addressed. Reviewer 1 raises more serious concerns. In the most part they relate to the taxonomic framework. I recommend that the authors carefully consider the review and either explicitly justify the use of the Benson 2010 framework (as oppose to the more recent ones discussed by the reviewer) or follow the alternative taxonomic groups and resulting synapomorphies detailed by reviewer 1. I look forward to seeing the revised manuscript and response letter.

Reviewer comments to Author:

Reviewer: 1

Comments to the Author(s)

New carcharodontosaurian theropod remains from the mid-Cretaceous Griman Creek Formation, Lightning Ridge (New South Wales, Australia)

1. Present paper is well presented, materials are well described and compared, and bibliography is updated. However, the methodological approach has some discussable aspects: first, the fragmentary preservation of the scarce available bones constitute a serious obstacle for firm taxonomic referral; 2) novel conclusions on theropod faunal composition presented by the authors are based on fragmentary and poorly informative bones; 3) main taxonomic, phylogenetic and paleobiogeographic conclusions are framed within interpretations made by Benson et al. 2010, which analysed character data and theropod taxa in a partial way, overlooking apomorphic similarities that megaraptorans share with coelurosaurs in general, and tyrannosauroids in particular. In sum, present paper, in my view, reports on new theropod remains which neither amplify nor modify current interpretations on the taxonomic composition of theropod Cretaceous faunas from Australia.

2. When referring to Patagonian theropod faunas, let me suggest something like: "...at roughly the same palaeolatitude, which hosted a diverse range of abelisaurids, alongside carcharodontosaurids and megaraptorids". The reason of this change in the phrase is that in Patagonia the numerically dominant theropods (in the lapse Aptian through Turonian) are abelisaurids, being seconded by carcharodontosaurids and megaraptorids (in this order). Thus,

the main difference between Australia and Patagonia is the predominance of megaraptorids in the first continent, vs abelisaurids in the second one (currently unrecorded in Australia).

3. The use of "carcharodontosaurian" to describe the Australian theropod faunas is misleading, and I emphatically recommend dismiss its use (based on what we currently know about Australia fossil record). The reasons are two: first, megaraptorids are, by far, the most frequently found theropods in Australia; second, the term "carcharodontosaurian" that is used to gather carcharodontosaurids plus megaraptorids, is by following Benson et al 2010, a hypothesis that is weaker than that depicting megaraptorids as coelurosaurians (as detailed in Novas et al., 2013, Porfiri et al. 2014, and more recently by a different crew led by Porfiri et al. 2018).

4. The systematic framework, as here exposed, arbitrarily takes part for an already contested hypothesis on megaraptoran relationships. Present authors do not follow alternative hypotheses (i.e., Novas et al., 2013; Porfiri et al., 2014, 2018) based on a wrong argument: they state about the necessity to "incorporate a broader sampling of basal tetanurans and basal coelurosaurian characters and taxa is required before either hypothesis can be accepted over the current consensus view". But we have ALREADY DID this task! In Novas et al. 2013 paper, we incorporated a broader sampling than that presented by Benson, by merging two comprehensive datasets: the one by Benson et al. 2010 on basal tetanurans, and the one by Brusatte et al. 2010 on tyrannosauroids. With the incorporation of these later theropods the results got were substantially different from those exposed by Benson et al 2010. In other words, present authors counters their own proposal to "incorporate a broader sampling of characters and taxa", by choosing the more restrictive dataset (i.e., Benson's dataset). By the way, the same criticism applies for Brusatte and Carr (2016; ref 52 of the present ms), who overlooked our methodological approach. Finally, it is clear that there is no "current consensus" that megaraptorans are neovenatorid carcharodontosaurians: a recent paper by Porfiri et al. 2018 (a different working group that mine) concluded that megaraptorans are coelurosaurs, demonstrating, again, that the old idea that megaraptorans are allosauroids has not the best support.

5. Countering present authors, the evidence presented here is ambiguous -at least- to support referral to Allosauroidae and Carcharodontosauria / Carcharodontosauridae. The available bones can be also referred to Megaraptoridae, based on morphology, being in accordance with previous discoveries of the same group of theropods in the same fossil site as well as other sites in Australia.

6. I strongly discourage determination of the kind and degree of internal structure of vertebra just observing limited (and not analogous) portions of a vertebra. To get reliable information on this yet poorly known aspect of theropod anatomy, it is needed to make comparisons based on equivalent cross-section planes. Porfiri et al 2014 called attention on this aspect by documenting the presence of camerate and camellate conditions in different parts of a single dorsal centrum of Megaraptor.

7. The Patagonian megaraptorid Orkoraptor has a keel on the ventral side of proximal caudal centra. This feature was neither described nor illustrated in its original paper (Novas et al. 2008), but I can provide the authors with images of the vertebra showing this feature. A ventral keel of this kind is also present in a mid-caudal of Aerosteon.

8. This length/width ratio applies to many basal tetanurans, including Allosaurus, Giganotosaurus, Aerosteon, Anyksosaurus, Juratyrann. Thus, it does not appear to diagnose a particular tetanuran clade.

9. Based on the comments made above on each of the three listed features, I must conclude that they do not conform a set of characters "commonly found" among carcharodontosaurians, but

among basal tetanurans. Again: the problem is not with characters but with the limited factual evidence to discern to which particular taxonomic group they belong.

10. Unfortunately, the evidence yielded from this fossil site is not decisive to certify the presence of a theropod group other than already described megaraptorids.

Fernando E. Novas  
Principal Researcher Conicet  
Head Laboratory of Comparative Anatomy  
Museo Argentino de Ciencias Naturales, Buenos Aires  
Argentina

Reviewer: 3

Comments to the Author(s)

Dear Authors and Editor,

I congratulate the authors for such a well-written and concise article. This MS contributes to the knowledge of the still poorly known and enigmatic theropod faunas from Australia. I have some concerns about the identification of the material and the features sustaining it. I think that authors should improve comparisons with carcharodontosaurids and megaraptorans. I include some brief comments in this regard within the PDDF that I am attaching.

All the best,

Federico Agnolin

## Author's Response to Decision Letter for (RSOS-180826.R0)

See Appendix C.

## Decision letter (RSOS-180826.R1)

17-Dec-2018

Dear Mr Brougham,

I am pleased to inform you that your manuscript entitled "New theropod material from the mid-Cretaceous Grimman Creek Formation, Lightning Ridge (New South Wales, Australia)" is now accepted for publication in Royal Society Open Science.

You can expect to receive a proof of your article in the near future. Please contact the editorial office ([openscience\\_proofs@royalsociety.org](mailto:openscience_proofs@royalsociety.org) and [openscience@royalsociety.org](mailto:openscience@royalsociety.org)) to let us know if you are likely to be away from e-mail contact. Due to rapid publication and an extremely tight schedule, if comments are not received, your paper may experience a delay in publication.

Royal Society Open Science operates under a continuous publication model (<http://bit.ly/cpFAQ>). Your article will be published straight into the next open issue and this will be the final version of the paper. As such, it can be cited immediately by other researchers.

As the issue version of your paper will be the only version to be published I would advise you to check your proofs thoroughly as changes cannot be made once the paper is published.

On behalf of the Editors of Royal Society Open Science, we look forward to your continued contributions to the Journal.

Kind regards,  
Andrew Dunn  
Royal Society Open Science Editorial Office  
Royal Society Open Science  
[openscience@royalsociety.org](mailto:openscience@royalsociety.org)

on behalf of Dr Robert Sansom (Associate Editor) and Jon Blundy (Subject Editor)  
[openscience@royalsociety.org](mailto:openscience@royalsociety.org)

Associate Editor Comments to Author (Dr Robert Sansom):

We thank the authors for addressing the reviewers comments comprehensively. The final lingering concern of reviewer 1 has been directly addressed in this revised manuscript. Given that, and the positive comments from the other reviewers, I am happy to recommend publication.

Follow Royal Society Publishing on Twitter: @RSocPublishing  
Follow Royal Society Publishing on Facebook:  
<https://www.facebook.com/RoyalSocietyPublishing.FanPage/>  
Read Royal Society Publishing's blog: <https://blogs.royalsociety.org/publishing/>

## Appendix A

Reviewer 1:

Point 1 - The palaeobiogeographic section has been removed. We remain ambivalent with regards to the studies debating the affinities of the Australian theropod specimens raised by Reviewer 1 as this topic is beyond the scope of the present manuscript. In addition, an in-depth consideration of alternative phylogenetic hypotheses is not warranted in the present manuscript, which is purely descriptive in nature. We also express doubts on Reviewer 1's assertions of the purported robustness of the studies upon which the aforementioned alternative hypotheses are ultimately based (see below).

Points 2, 4, 6, 8 - A paragraph stating the reasons for using the preferred phylogenetic hypothesis has been inserted into the Systematic Palaeontology section. Additionally, we take issue with Reviewer 1's strong conviction that his preferred hypothesis for the placement of Megaraptora is correct. Phylogenetic hypotheses are always subject to interpretation based upon consideration of the characters and taxa upon which it is constructed. In our view, the phylogenetic studies upon which Reviewer 1's favoured hypothesis is based (Novas et al. 2013, Porfiri et al. 2014) are insufficient to resolve the affinities of Megaraptora to any degree of certainty. The sampling regime employed included considerably fewer characters than either the most comprehensive basal tetanuran (Carrano et al. 2012) or tyrannosauroid (Carr et al. 2017) datasets. Certain characters used to justify a tyrannosauroid placement of Megaraptora by Porfiri et al. (2014), (e.g., D-shaped premaxillary teeth) have since been shown to be misidentified (Apestiguia et al. 2016). Furthermore, Novas et al. (2016) concluded that the manual anatomy of Australovenator shared many characters with that of Allosaurus, and stated that "Megaraptor and Australovenator are devoid of several manual features that the basal tyrannosauroid Guanlong shares with more derived coelurosaurs (e.g., Deinonychus), thus countering our own previous hypothesis that Megaraptora is well nested within Tyrannosauroidea." Until such time as multiple independent phylogenetic analyses are presented that adequately sample basal tetanuran and tyrannosauroid characters and taxa, and that converge on a single hypothesis for the placement of Megaraptora, we will refer to the diagnosis and placement of the clade (Benson et al. 2010).

Point 5 - We consider that our citation of sources describing variations within megaraptoran taxa and the differing hypotheses for the phylogenetic placement of Megaraptora is presently adequate, as the manuscript under consideration does not make any new contributions or assumptions regarding the morphology of megaraptorans or their affinities.

Points 7, 9, 22, 23, 24, 25 and 26 - The section pertaining to biogeographic implications has been removed.

Point 10, 20 - A section comparing the vertebral and pelvic material with those of the basal ornithopod Muttaborrasaurus and somphospondylan sauropods Wintonotitan, Diamantinasaurus and Savannasaurus has been inserted.

Point 11 - A table containing selected measurements of tetanuran caudal vertebral and pelvic material has been included to provide additional justification for considering the elements LRF 3310-3312 as associated.



Point 12 - Reviewer 1 has misunderstood the reason for the significance of the diagenetic silica on LRF 3310. As has been more clearly phrased in the revised manuscript, the diagenetic silica appears to have preferentially formed around areas of exposed internal bone, which in this case is either broken or eroded surfaces. However, the area in the vicinity of the fossa at the base of the neural arch, which also bears diagenetic silica, does not appear to have been affected by either activity - therefore it is hypothesised that this fossa may have had a pneumatic function. This interpretation is supported by the hypothesised presence of similarly coloured silica "channels" within the neural spine, visible on its broken dorsal surface.

Point 13 - We have acknowledged the possibility of serial variation in the type of vertebral internal structure in the description of LRF 3310-3312.

Point 14, 15 - The pubic peduncle (LRF 3312) is preserved as a pseudomorph, as stated in the Systematic Palaeontology section. We believe that our description adequately compares this specimen with the pubic peduncles of megaraptorans. There is no indication of extensive pneumaticity on the medial or lateral surfaces of the pubic peduncle, as in *Aerosteon* and *Murusraptor*. We do not expect that such obvious features would be erased by the taphonomic processes when the fine ventrolateral striations were left untouched.

Point 16 - Variation in the length to width ratio of the pubic peduncle of the ilium has been recognised as phylogenetically informative for tetanuran theropods. An increase in the relative anteroposterior length of the the pubic peduncle occurred within *Avetheropoda*, with a length to width ratio greater than two diagnosed as a synapomorphy of *Allosauria* (Carrano et al. 2012). Within *coelurosaur*s, at least one described specimen of *Tyrannosaurus* also has pubic peduncles that are considerably longer anteroposteriorly than wide (Brochu 2003), consistent with the aforementioned trend of elongation.

Point 3, 17 - We have rephrased the sentence referred to in Point 17 to imply allosauroid affinities for LRF 3310-3312, with probable carcharodontosaurian affinities under the taxonomic framework we have adopted. We disagree that LRF 3310-3312 is only referable to *Theropoda* indet. and have included, as supplementary information, the results of phylogenetic analyses that include these elements. The presence of vertebral camellae and ventrally keeled proximal caudal vertebrae optimise as synapomorphies of a polytomy including LRF 3310-3312 and carcharodontosaurian taxa in the Carrano et al. (2012) matrix as modified by Apesteguía et al. (2016).

Point 18 - This paragraph has been removed.

Point 19 - This sentence has been removed.

Point 21 - These isolated elements are no longer within the scope the present manuscript and have been removed.

Reviewer 2:

We thank Reviewer 2 for their favourable comments on the quality of the descriptive work presented in the manuscript under consideration. As mentioned previously, we accept the criticism of the palaeobiogeographic discussion and have decided to remove it for resubmission, thus addressing the most serious concerns raised by Reviewer 2.

**Appendix B****ROYAL SOCIETY  
OPEN SCIENCE****New carcharodontosaurian theropod remains from the mid-Cretaceous Griman Creek Formation, Lightning Ridge (New South Wales, Australia)**

|                               |                                                                                                                                                                                                                       |
|-------------------------------|-----------------------------------------------------------------------------------------------------------------------------------------------------------------------------------------------------------------------|
| Journal:                      | <i>Royal Society Open Science</i>                                                                                                                                                                                     |
| Manuscript ID                 | RSOS-180826                                                                                                                                                                                                           |
| Article Type:                 | Research                                                                                                                                                                                                              |
| Date Submitted by the Author: | 04-Jun-2018                                                                                                                                                                                                           |
| Complete List of Authors:     | Brougham, Tom; University of New England, School of Environmental and Rural Sciences<br>Smith, Elizabeth; Australian Opal Centre<br>Bell, Phil; University of New England, School of Environmental and Rural Sciences |
| Subject:                      | Palaeontology < EARTH SCIENCES                                                                                                                                                                                        |
| Keywords:                     | Cretaceous, Australia, Dinosauria, Theropoda                                                                                                                                                                          |
| Subject Category:             | Earth science                                                                                                                                                                                                         |
|                               |                                                                                                                                                                                                                       |

SCHOLARONE™  
Manuscripts

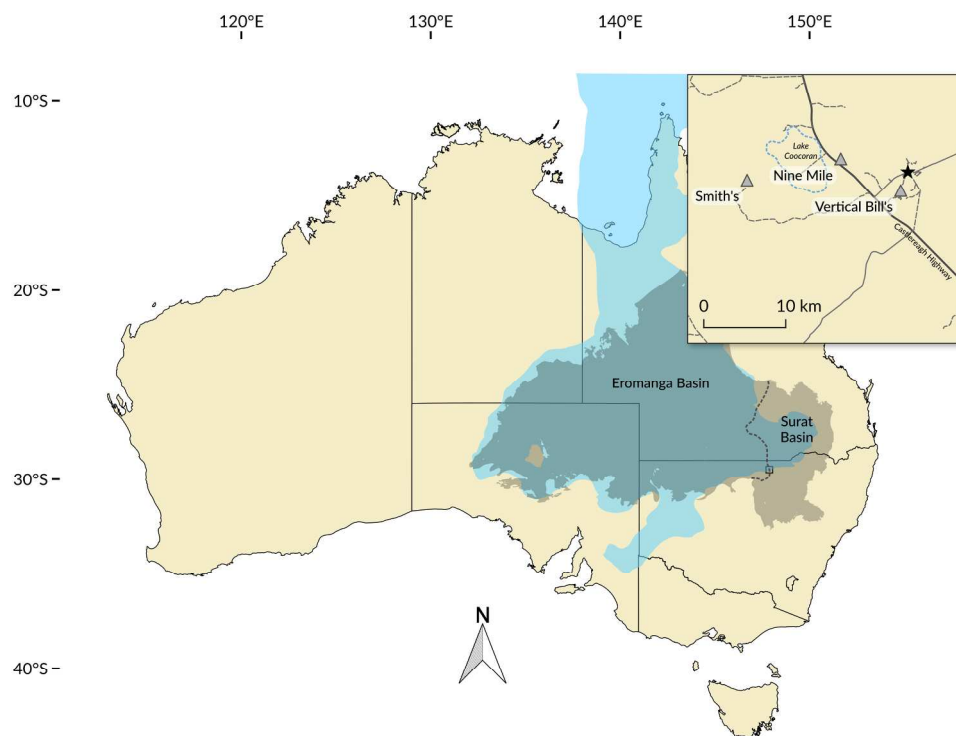

32 Map of Australia showing the location of Lightning Ridge and the mineral claims in which the fossils were  
 33 recovered. The extent of Cretaceous Eromanga and Surat basins in the early to middle Albian is represented  
 34 by the grey area separated by dashed line. The inset map (location indicated by the boxed area) shows the  
 35 area in the vicinity of Lightning Ridge (marked by the star) and the locations of the mineral claims of the  
 36 two theropod occurrences (marked by triangles). Australia coastline uses data taken from GEODATA COAST  
 37 100K 2004 provided by Geoscience Australia (<http://www.ga.gov.au/metadata-gateway/metadata/record/61395>). Basin extents uses data taken from Stewart et al. (2013).

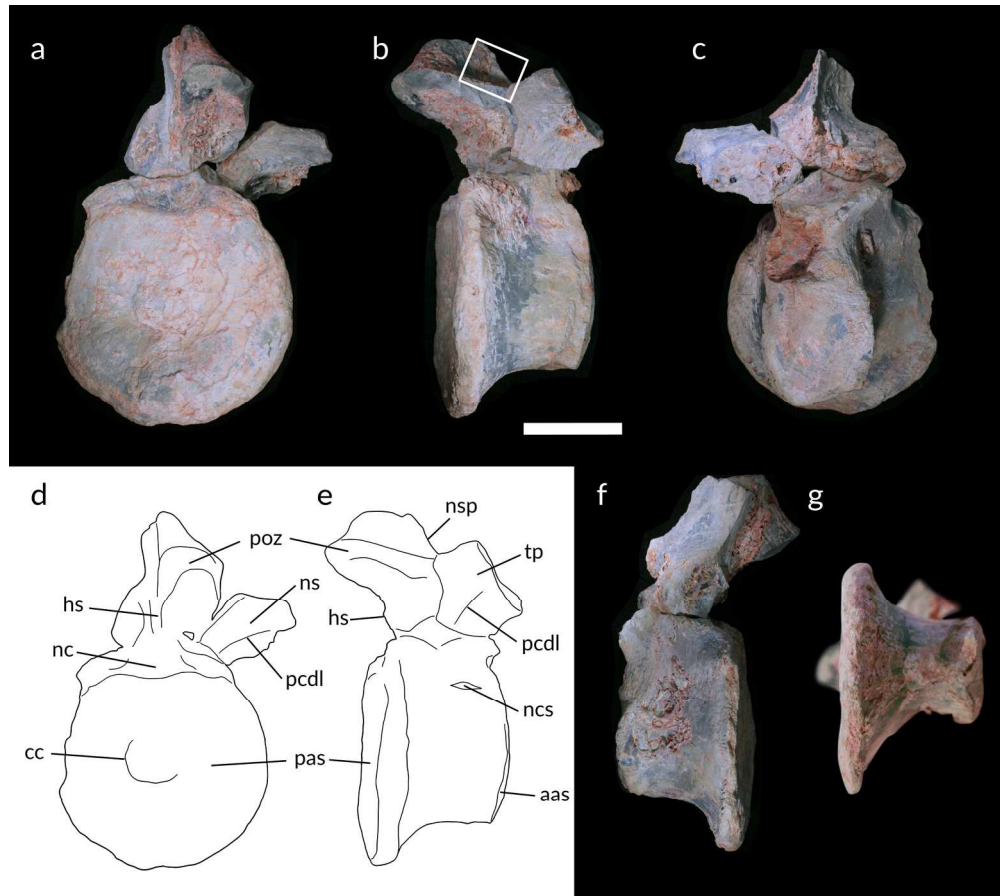

Anterior caudal vertebra LRF 3310 in a, d) posterior, (b,e) right lateral, (c) anterior (f) left lateral (g) ventral views. Boxed area on (b) is expanded in [fig:lrf-3310-fossa]. Abbreviations: aas, anterior articular surface; cc, central convexity; hs, hyposphene; nc, neural canal; ncs, neurocentral suture; nsp, neural spine; pas, posterior articular surface; pcdl, posterior centrodiapophyseal lamina; poz, postzygapophysis. Scale bar equals 50 mm.

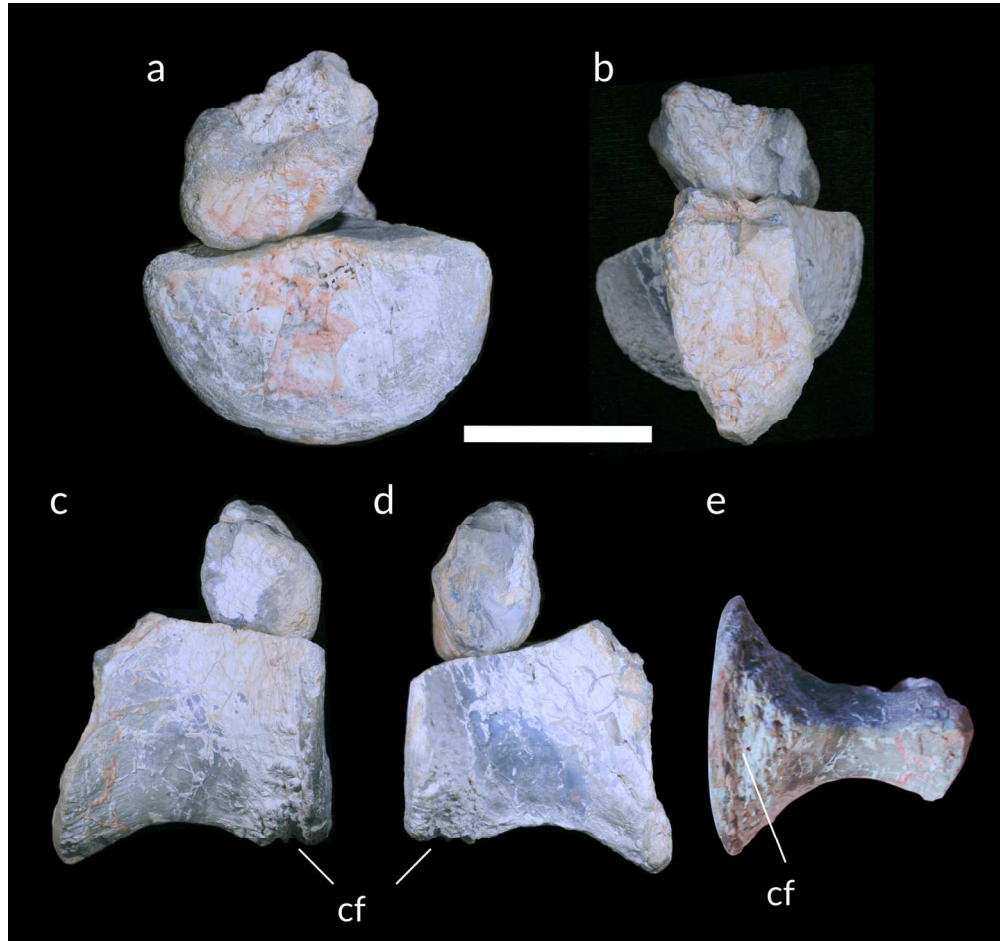

Anterior caudal vertebra LRF LRF 3311 in (a) posterior, (b) anterior, (c,d) lateral and (e) ventral views. Abbreviations: cf, chevron articular facet; nc, neural canal. Scale bar equals 50 mm.

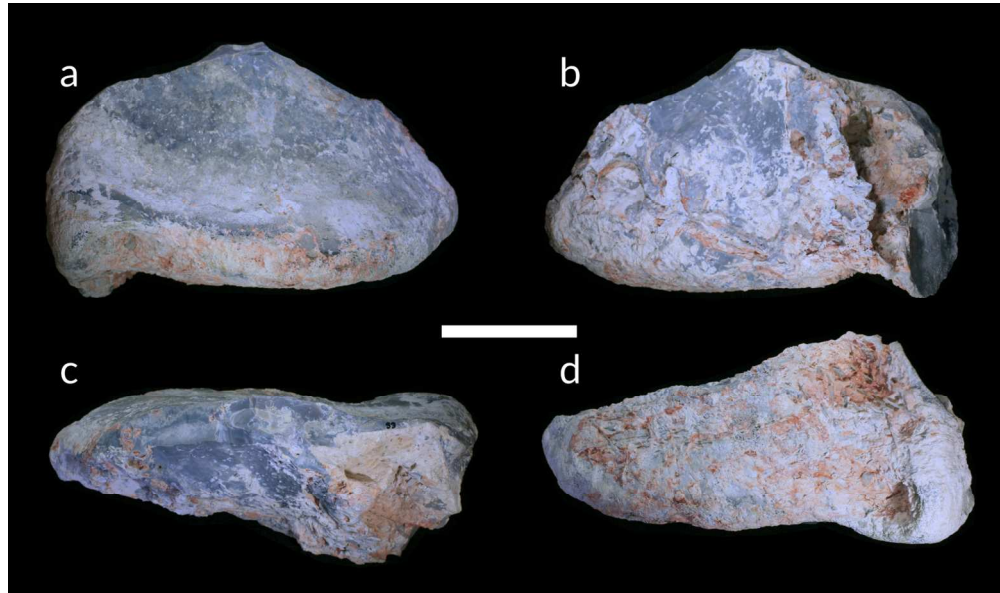

Right pubic peduncle of the ilium LRF 3312 in (a) lateral, (b) medial, (c) dorsal and (d) ventral. Scale bar equals 50 mm.

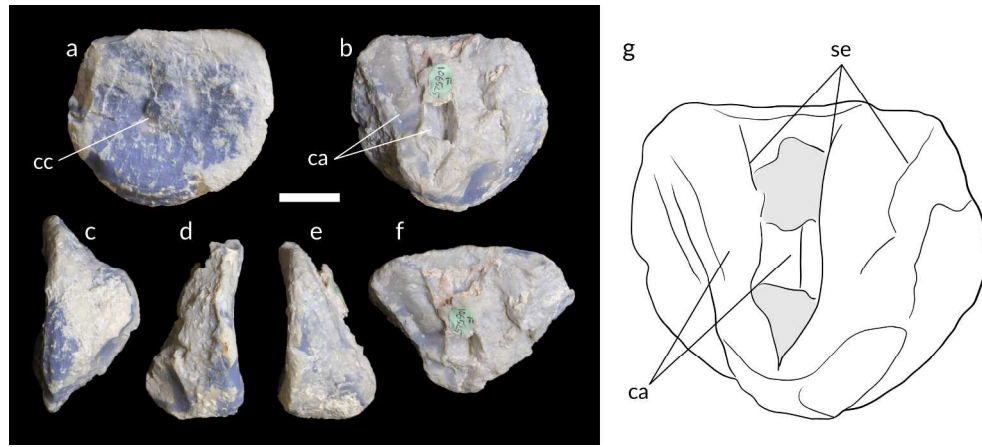

Vertebral articular end AM F106525. a) articular surface of the centrum; b) view of broken surface of the centrum; c) ventral surface; d, e) lateral surfaces; f) oblique dorsal view; g) interpretive drawing of the exposed internal structure of the centrum, grey indicates presence of interior septa overlying the camerae. Abbreviations: cc, central convexity; ca, camerae; se, septa. Scale bar equals 20 mm.



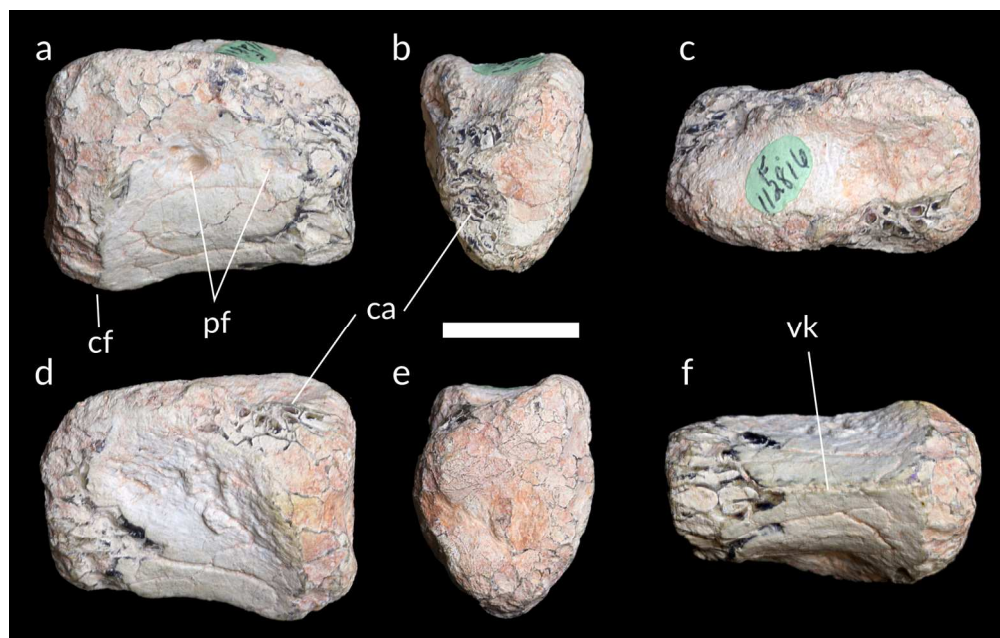

Vertebral centrum AM F112816 in a) right lateral, b) anterior, c) dorsal, d) left lateral, e) posterior, and f) ventral views. Abbreviations: ca, camellae; cf, chevron facet; pf, pneumatic foramina; vk, ventral keel. Scale bar equals 20 mm.



1  
2  
3  
4  
5  
6  
7  
8  
9  
10  
11  
12  
13  
14  
15  
16  
17  
18  
19  
20  
21  
22  
23  
24  
25  
26  
27  
28  
29  
30  
31  
32  
33  
34  
35  
36  
37  
38  
39  
40  
41  
42  
43  
44  
45  
46  
47  
48  
49  
50  
51  
52  
53  
54  
55  
56  
57  
58  
59  
60

| Measurement                                  | LRF 3310 | LRF 3311 | AM F112816 |
|----------------------------------------------|----------|----------|------------|
| Centrum, anterior articular surface, width   | 47.3 -   |          | ?          |
| Centrum, anterior articular surface, height  | 58.5 -   |          | 27         |
| Centrum, posterior articular surface, width  | 101.6    | 73.4 ?   |            |
| Centrum, posterior articular surface, height | 93.3 -   |          | 32.4       |
| Centrum, anteroposterior length              | 58.3     | 65.6     | 44.9       |
| Centrum, mediolateral width at mid-length    | 41.5     | 26.7     | 17.1       |
| Centrum, dorsoventral height at mid-length   | 58.1 -   |          | ?          |
| Neural arch, height                          |          | 20.3 -   | -          |
| Neural canal, width                          | 30.8*    | -        | -          |
| Neural canal, height                         | 20.3*    | -        | -          |

1  
2  
3  
4  
5  
6  
7  
8  
9  
10  
11  
12  
13  
14  
15  
16  
17  
18  
19  
20  
21  
22  
23  
24  
25  
26  
27  
28  
29  
30  
31  
32  
33  
34  
35  
36  
37  
38  
39  
40  
41  
42  
43  
44  
45  
46  
47  
48  
49  
50  
51  
52  
53  
54  
55  
56  
57  
58  
59  
60

| Taxon                 | Source                          | Ilium pubic peduncle |       |                 |      |
|-----------------------|---------------------------------|----------------------|-------|-----------------|------|
|                       |                                 | Length               | Width | Length ÷ height |      |
| LRF 3310/3313         | -                               |                      | 152   | 78              | 1.94 |
| <i>Aerosteon</i>      | Sereno et al. (2008)            |                      | 169   | 81              | 2.09 |
| <i>Ichthyovenator</i> | Allain et al. (2012)            |                      | 138   | 75              | 1.84 |
| <i>Majungasaurus</i>  | O'Connor (2007); Carrano (2007) | 82*                  | 62*   | 1.32*           |      |
| <i>Neovenator</i>     | Brusatte et al. (2008)          |                      | 135   | 67              | 2.01 |

1  
2  
3  
4  
5  
6  
7  
8  
9  
10  
11  
12  
13  
14  
15  
16  
17  
18  
19  
20  
21  
22  
23  
24  
25  
26  
27  
28  
29  
30  
31  
32  
33  
34  
35  
36  
37  
38  
39  
40  
41  
42  
43  
44  
45  
46  
47  
48  
49  
50  
51  
52  
53  
54  
55  
56  
57  
58  
59  
60

Caudal vertebra 1

| Posterior<br>width | Posterior<br>height | Ilium pubic peduncle ÷<br>caudal vertebra 1 width |
|--------------------|---------------------|---------------------------------------------------|
| 101.6              | 93                  | 0.77                                              |
| 128                | 118                 | 0.63                                              |
| 141                | 120                 | 0.53                                              |
| 52.3               | 58.8                | 1.19                                              |
| 100*               | 114                 | 0.67                                              |

# New carcharodontosaurian theropod remains from the mid-Cretaceous Griman Creek Formation, Lightning Ridge (New South Wales, Australia)

Tom Brougham<sup>1\*</sup>, Phil R. Bell<sup>1</sup>, Elizabeth T. Smith<sup>2</sup>

<sup>1</sup>School of Environmental and Rural Science, University of New England, Armidale 2351, NSW, Australia

<sup>2</sup>Australian Opal Centre, 3/11 Morilla Street, Lightning Ridge 2834, NSW, Australia

\*tbrougha@myune.edu.au

## Abstract

The limited fossil record of Australian Cretaceous theropods is dominated by megaraptorans, reported from associated and isolated material from the Early Cretaceous of Victoria and the 'mid'-Cretaceous of central-north New South Wales and central Queensland. Here, we report on new postcranial theropod material from the early Late Cretaceous Griman Creek Formation at Lightning Ridge. Among this new material is an associated set consisting of two anterior caudal vertebrae and a pubic peduncle of the ilium. These elements display a combination of characteristics typically associated with carcharodontosaurian theropods, include camellate internal composition of the vertebral centra, ventrally keeled anterior caudal centra and a pubic peduncle of the ilium with a ventral surface approximately twice as long anteroposteriorly as mediolaterally wide. The absence of pneumaticity in the pubic peduncle and the anterior caudal centra contrasts with its presence in all megaraptorids in which those elements are preserved, indicating that megaraptorid affinities for this material are unlikely. A morphologically similar partial vertebral centra also from the Griman Creek Formation is tentatively referred with this material, which differs in bearing a camerate internal composition. This new material is distinct from previously-described Lightning Ridge megaraptorid material and thus represents a second carcharodontosaurian from this interval. Additionally, a mid-caudal vertebral centrum bearing pneumatic foraminae and extensive

1  
2 camellae is referred to Megaraptora and is the first axial skeletal element of a megaraptorid  
3  
4 allosauroid described from Lightning Ridge.  
5  
6

## 7 8 **Introduction**

9  
10 The fossil record of Australian Cretaceous theropods is scarce and is composed almost  
11 exclusively of isolated and fragmentary remains [1]. The majority of the reported Australian  
12 theropod skeletal material to date has come from the a diverse high-latitude fauna of the  
13 Aptian–Albian Otway and Gippsland groups of southern Victoria, consisting of isolated  
14 individual elements of megaraptorans, maniraptorans, ceratosaurians, spinosaurids and  
15 putative tyrannosauroids [1–8]. In contrast, the most complete Australian theropod is the  
16 megaraptorid *Australovenator wintonensis* from the Cenomanian–Turonian Winton Formation  
17 of central Queensland, known from mandibular, forelimb, hindlimb and pelvic elements [11–  
18 14]. Despite the evidence for a high diversity of theropods in Australia, the record of apex  
19 theropod predators appears to be dominated by megaraptorids. This is in contrast to  
20 contemporaneous diverse theropod fossil record of Patagonia, at roughly the same  
21 palaeolatitude, which alongside megaraptorids hosted a diverse range of  
22 carcharodontosaurids and abelisaurids [10]  
23  
24  
25  
26  
27  
28  
29  
30  
31  
32

33 The Griman Creek Formation (GCF) at Lightning Ridge in northern New South Wales  
34 preserves one of the most diverse Australian Cretaceous terrestrial faunal assemblages  
35 [15,16], the vertebrate component of which has received little attention until recently. The  
36 first named Australian theropod, *Rapator ornitholestoides*, was described on the basis of a  
37 single metacarpal I discovered in the GCF in the vicinity of Lightning Ridge [17]. While this  
38 taxon is now considered to be a *nomen dubium*, subsequent  comparisons with the same  
39 element in *Australovenator* and *Megaraptor* indicate **neovenatorid**, and possibly  
40 megaraptoran, affinities for *Rapator* [1,14,18]. More recently, the associated remains of a  
41 **megaraptorid** were described from a proximal ulna, proximal manual ungual, pubic peduncle  
42 of the ilium, fibula and metatarsal III [19]. Aside from *Australovenator*, this specimen  
43 represents only the second example of associated preservation of theropod remains in  
44 Australia. Here, we report on new postcranial theropod material, including an association of  
45 caudal vertebrae and pelvic elements, from the GCF near Lightning Ridge, New South Wales.  
46 We also describe a megaraptoran mid-caudal vertebral centrum, the first axial vertebral  
47  
48  
49  
50  
51  
52  
53  
54  
55  
56  
57  
58  
59  
60

1  
2 element of a megaraptorid **allosauroid** to be described from Lightning Ridge. These fossils  
3  
4 provide further evidence demonstrating the preponderance of carcharodontosaurian  
5  
6 allosauroids among the theropod fauna of the Australian Cretaceous.  
7

## 8 9 **Institutional abbreviations**

10  
11 LRF (Australian Opal Centre, Lightning Ridge, New South Wales)  
12  
13

## 14 15 **Locality and geological setting**

16  
17 All fossils were excavated from subsurface beds of the Griman Creek Formation as a result of  
18  
19 opal mining activity in the vicinity of Lightning Ridge, central-northern New South Wales,  
20  
21 Australia (Fig. 1). The Griman Creek Formation is situated within the Surat Basin, which  
22  
23 extends over south-eastern Queensland and northern New South Wales. The Eromanga Basin  
24  
25 neighbours the Surat Basin to the west (Fig. 1). Together, these two basins mark the  
26  
27 maximum transgression of the Eromanga Sea, which persisted across the central part of  
28  
29 Australia for much of the Early Cretaceous and up to the Cenomanian, and form the majority  
30  
31 of the present-day Great Artesian Basin. The Griman Creek Formation is composed of thinly  
32  
33 laminated and interbedded fine- to medium-grained sandstones, siltstones and mudstones,  
34  
35 with carbonate cements, intraformational conglomerate beds and coal deposits [20,21].  
36  
37 Within the Griman Creek Formation, opal and fossils occur within interbedded siltstone and  
38  
39 mudstone layers, often referred to informally as the Finch clay facies [22]. Preservation of  
40  
41 fossils at Lightning Ridge—including those specimens described here—is commonly in the  
42  
43 form of natural casts, or pseudomorphs, in non-precious opal [19,23,24]. The depositional  
44  
45 environment of the Griman Creek Formation is interpreted as a lacustrine to estuarine coastal  
46  
47 floodplain with fluvial and deltaic influences [19]. New radiometric dates (PRB, unpublished  
48  
49 data) for the Griman Creek Formation indicates that the opal-bearing, fossiliferous layer is  
50  
51 significantly younger than late Albian age that had previously been assigned on the basis of  
52  
53 palynomorphs [22] and radiometric dates from fission track analysis of detrital zircons  
54  
55 obtained from subsurface samples of the Griman Creek Formation in Queensland [25].  
56  
57 Consequently, deposition of the fossiliferous part of Griman Creek Formation at Lightning  
58  
59 Ridge took place during the early Cenomanian, penecontemporaneous with the deposition of  
60  
the fossiliferous upper portion of the Winton Formation [[26]; PRB unpublished data].

1  
2 The Griman Creek Formation at Lightning Ridge preserves a rich array of vertebrate and  
3 invertebrate fauna, including crocodylomorphs [23,27,28], australosphenidian mammals [29–  
4 31], ornithischian dinosaurs [32,33], titanosauriform sauropods [34],  
5 megaraptoran theropods [19,35], enantiornithine birds [36], pterosaurs [37], plesiosaurs  
6 [38], turtles [39,40], dipnoan lungfish [41–43], a possible synapsid [24] and numerous species  
7 of non-marine macro-invertebrates [22,44–46]. A complete description of the vertebrate  
8 community of the Griman Creek Formation at Lightning Ridge will be presented elsewhere  
9 [PRB unpublished data].  
10  
11  
12  
13  
14  
15  
16  
17

## 18 **Systematic framework**

19  
20 In the proceeding descriptions and discussion, Megaraptoridae is considered to be nested  
21 within Neovenatoridae, which together with its sister clade Carcharodontosauridae forms  
22 Carcharodontosauria [48]. Recently proposed placements of Megaraptoridae within  
23 Tyrannosauroidae [10,49,50] or as the sister taxon of Coelurosauria [51] are acknowledged as  
24 alternative hypotheses. However, as noted elsewhere [52], only one phylogenetic dataset so  
25 far supports these novel relationships; corroboration by independent phylogenetic analyses  
26 that incorporate a broader sampling of basal tetanuran and basal coelurosaurian characters  
27 and taxa is required before either hypothesis can be accepted over the current consensus  
28 view. Nomenclature for description of vertebral laminae and fossae follows that of [53] and  
29 [54] respectively.  
30  
31  
32  
33  
34  
35  
36  
37  
38  
39

## 40 **Systematic palaeontology**

41 Dinosauria Owen, 1842

42 Theropoda Marsh, 1881

43 Tetanurae Gauthier, 1986

44 Allosauroidae Currie and Zhao, 1993

45 Carcharodontosauria Benson, Carrano and Brusatte, 2010  
46  
47  
48  
49  
50  
51  
52  
53  
54  
55  
56  
57  
58  
59  
60

## Material

Two anterior (LRF 3310, LRF 3311) and one (?)mid (AM F112816) caudal vertebrae, a right pubic peduncle of the ilium (LRF 3312), and a centrum articular surface (AM F106525). LRF 3310–3312 were recovered from a one metre diameter drill shaft in the eastern section of Smiths Field on the Coocoran opal field, approximately 20 km west of Lightning Ridge (Fig. 1). Their close association within the thin opal- and fossil-bearing layer of the GCF and the absence of overlapping material or other taxa in the immediate vicinity indicates that they pertain to a single individual. AM F106525 was recovered from a mineral claim known as ‘The Bone Yard’ at the Nine Mile field, approximately 8 km west-northwest of Lightning Ridge (Fig. 1).

## Preservation

### LRF 3310–3312

LRF 3310 represents an almost complete centrum, the posterior part of the neural arch, and the base of the right transverse process (Fig. 2). The anterior end of the vertebral centrum has been abraded but is intact (Fig. 2b). The posterior articular surface of the centrum is well preserved but is missing a portion of the left rim (Fig. 2a). The left lateral surface of the centrum has been crushed (Fig. 2d), resulting in a rightward displacement of the anterior end of the centrum in ventral view (Fig. 2e). Diagenetic veins of silica have formed in and around the crushed area on the left side of the centrum; this mineralisation can also be seen on the neural spine and postzygapophysis (Fig. 2d, Fig. 3). Of the neural arch, only the right postzygapophysis and the bases of the right transverse process and neural spine are preserved. The edges of the articular surface of the postzygapophysis have been eroded (Fig. 2c).

LRF 3311 represents the ventral portion of a centrum and a dorsal fragment of the posterior articular surface (Fig. 4). The anterior articular end of the centrum has been broken off, exposing an internal cavity (Fig. 4b); no internal structures can be discerned along the plane of the break.

LRF 3312 is interpreted as representing the ventral end of the pubic peduncle of a right ilium. The broken and exposed dorsal surface is mediolaterally thin, and the interior of the bone



1  
2 appears to have been preserved as a solid mass of opal, obscuring any detail of the original  
3 bone texture. The lateral surface is well preserved whereas only the dorsalmost portion of the  
4 medial surface of the peduncle is visible through the adherent matrix (Fig. 5a,b). The ventral  
5 surface, where it would have contacted the proximal pubis, is heavily eroded and densely  
6 covered in matrix. On the concave posteroventral surface, two subcircular depressions are  
7 present (Fig. 5d) that are inferred to be possible bioerosional features, and as such do not  
8 represent an original feature of the bone. Only the ventrolateral portion of the acetabular  
9 margin is preserved.  
10  
11  
12  
13  
14  
15

## 16 **AM F106525**

17  
18 AM F106525 are both isolated articular end of a centrum. In AM F106524, only a small  
19 portion of the body of the centrum is present with the ventral surface preserving the greatest  
20 length of centrum, whereas in AM F106525 only a thin portion of the centrum is preserved.  
21  
22  
23  
24

## 25 **Description**

### 26 **LRF 3310–3312**

27  
28 As preserved, the centrum of LRF 3310 is shorter than tall; its anteroposterior length is  
29 markedly less than the dorsoventral height of the posterior articular surface (Table 1). The  
30 posterior articular surface is subcircular and slightly concave, the degree of concavity  
31 stronger towards the centre of the articular surface. A small subcircular convexity is present  
32 in the centre of the posterior articular surface, approximately one third of the width and  
33 height of the articular surface itself (Fig. 2a,e, Table 1). The rim of the posterior articular  
34 surface is thickened, the dorsal margin of which is depressed in posterior view, forming a  
35 trough level with the floor of the neural canal. There is no indication of a chevron facet on the  
36 posteroventral part of the centrum (Fig. 2b,g). The anterior articular surface is a  
37 dorsoventrally-elongate ellipse in anterior view. The dimensions of the anterior articular  
38 surface are markedly less than those of the posterior articular surface. In lateral view, the  
39 ventralmost extent of the anterior articular surface is dorsally offset relative to that of the  
40 posterior articular surface (Fig. 2b,c). The lateral surfaces of the centrum are smooth, concave  
41 anteroposteriorly and convex dorsoventrally, meeting ventrally to form a gently curved  
42 surface with no sign of either a ventral keel or mid-line groove. **No pneumatic foramina are**  
43 **visible on the lateral surfaces of the centrum.** On the right lateral surface, a slight depression is  
44  
45  
46  
47  
48  
49  
50  
51  
52  
53  
54  
55  
56  
57  
58  
59  
60

1  
2 present at the point of contact between the centrum and the neural arch, associated with  
3 traces of the closed neurocentral suture (Fig. 2b). An oblique fracture at the anterodorsal  
4 surface of the centrum reveals polygonal regions bounded by thin septa that representing the  
5 camellate internal structure of the centrum (Fig. 2d) .  
6  
7

8  
9  
10 The base of the transverse process of LRF 3310 is dorsoventrally compressed and extends  
11 laterally and horizontally from the neural arch. A weakly developed posterior  
12 centrodiapophyseal lamina is present on the posteroventral surface of the transverse process.  
13 A robust postzygadiapophyseal lamina extends between the transverse process and  
14 postzygapophysis but is partially broken. The postzygapophysis is robust and extends beyond  
15 the posterior articular surface of the centrum (Fig. 2b,c). The articular surface of the  
16 postzygapophysis faces mostly ventrally with a slight posteromedial inclination; it is  
17 subrectangular and slightly longer anteroposteriorly than wide mediolaterally. A hyposphene  
18 is present immediately ventromedially to the postzygapophysis. The base of the neural spine  
19 is positioned towards the posterior end of the centrum and is laterally compressed.  
20  
21  
22  
23  
24  
25  
26  
27

28 A depression is present at the base of the neural spine of LRF 3310 on the right side, anterior  
29 to the postzygapophysis; this surface is not preserved on the left side. This is interpreted here  
30 as representing a postzygapophyseal spinodiapophyseal fossa (posdf). The dorsal surface of  
31 the neural arch in the vicinity of this fossa bears a wrinkled texture that extends almost  
32 perpendicular to the neural spine and continues along the transverse process parallel to its  
33 posterior edge (Fig. 3). The wrinkled texture also appears to extend onto the lateral surface of  
34 the neural spine; however, diagenetic veins of silica within the fossa obscures much of this  
35 surface. The wrinkled texture does not extend posteriorly onto the base of the  
36 postzygapophysis. The posdf is most deeply impressed at its posteriormost extent,  
37 immediately anterior to the postzygapophysis. On the broken cross-section of the neural  
38 spine and dorsal to the posdf, six equally-spaced black marks are visible. These marks appear  
39 to represent the infilling of channels or foramina within the neural spine by silicate minerals;  
40 the presence of diagenetic silica veins on LRF 3310 appears to coincide with breakages or  
41 localised erosion on the external surface of the bone (see Preservation section above) that  
42 exposed internal structures within the centrum or neural arch. However, the posdf appears to  
43 have sustained no significant erosion or fractures as seen on other areas where diagenetic  
44 silica veins are observed. Therefore, based on the presence of diagenetic silica both within the  
45  
46  
47  
48  
49  
50  
51  
52  
53  
54  
55  
56  
57  
58  
59  
60

1  
2 posdf and channels within the neural spine, it is suggested that the posdf may have borne one  
3 or more foramina and thus served a pneumatic function.  
4

5  
6 The posterior articular surface of LRF 3311 is subcircular and slightly concave with a well-  
7 developed rim (Fig. 4a). Immediately anterior to this rim and on the ventral surface of the  
8 centrum is a transverse groove which probably represents an articular facet for the chevron  
9 (Fig. 4c,d). While the anterior articular surface is missing, comparisons with LRF 3310  
10 indicates that the anterior articular surface is likely to have been smaller than the posterior  
11 articular surface. In ventral view, the centrum is strongly constricted; the width of the  
12 centrum at its narrowest point is approximately one third of the mediolateral width of the  
13 posterior articular facet (Fig. 4e; Table 1). The lateral surfaces of the centrum are concave  
14 anteroposteriorly, gently convex dorsoventrally and, unlike in LRF 3310, converge ventrally  
15 to form a well-defined keel. A series of faint longitudinal striations are visible on the  
16 posterolateral surfaces of the centrum (Fig. 4e). The ventral margin of the centrum is concave  
17 in lateral view (Fig. 4c,d). Anteriorly, the ventralmost preserved point of the centrum extends  
18 ventral to the ventralmost point of the posterior articular surface, indicating that the missing  
19 anterior articular surface was ventrally offset relative to the posterior articular surface.  
20 Dorsally, the ventral outline of the neural canal is visible.  
21  
22  
23  
24  
25  
26  
27  
28  
29  
30  
31  
32

33 The pubic peduncle of the right ilium (LRF 3312) is roughly trapezoidal in lateral view  
34 (Fig. 5a,b). The anterior margin is oriented approximately 60 degrees relative to the ventral  
35 margin. The posterior (acetabular) margin is subvertical and mediolaterally convex ventrally  
36 (in posterior view); however, due to erosion the shape of the rest of the acetabular margin  
37 cannot be determined. In lateral view, the ventral margin forms a sinuous contour, the  
38 anterior two-thirds being convex whereas the posterior third is concave. In ventral view, the  
39 articular surface forms an isosceles triangle; its mediolaterally widest point forming the  
40 posterior end and tapering to its narrowest point anteriorly. The ventral surface is  
41 approximately twice as long anteroposteriorly as it is mediolaterally wide. The medial and  
42 lateral faces are weakly concave dorsoventrally and divergent towards the ventral surface.  
43 The anterior third of the lateral surface is ornamented by a series of parallel striae that extend  
44 parallel to the anterior margin of the peduncle in lateral view and are roughly equally spaced,  
45 approximately 1.5 mm apart. The striae are most densely packed ventrally (Fig. 5a). There is  
46  
47  
48  
49  
50  
51  
52  
53  
54  
55  
56  
57  
58  
59  
60

1  
2 no evidence of pneumaticity either in the form of internal cavities on the broken dorsal  
3 surface or foramina on the medial or lateral surfaces.  
4

### 6 **AM F106525**

7  
8 The articular surface of the centrum is subcircular; its dorsoventral height was probably close  
9 to that of the mediolateral width when complete, and therefore similar in shape to the  
10 articular surfaces of LRF 3310 and LRF 3311 (Fig. 6a; Table 1). The articular surface is slightly  
11 concave mediolaterally and dorsoventrally. A small subcircular convexity is present in the  
12 centre of the articular surface, similar to that seen on LRF 3310; this feature occupies  
13 approximately 27 percent of the mediolateral width of the articular surface (Fig. 2a; Fig. 6).  
14 The small ventral portion of the body of the centrum is concave anteroposteriorly, narrowing  
15 to approximately half the mediolateral width of the articular surface (Fig. 6c) and is slightly  
16 concave dorsoventrally. The broken lateral edges of the centrum indicate that the centrum  
17 became progressively wider dorsally (Fig. 6b,f). Ventrally, the surface of the centrum is  
18 flattened with no indication of a mid-line groove or keel (Fig. 6d,e).  
19  
20  
21  
22  
23  
24  
25  
26  
27

28 The broken surface of the centrum exposes internal cavities—two of which can be readily  
29 distinguished (Fig. 6b,g)—that extend inside the centrum towards the articular surface. As  
30 preserved, the more medial of these cavities extends further into the centrum than the lateral  
31 cavity, the septa of the former cavity converge to form an acute angle both immediately  
32 behind the articular surface and on the ventral floor of the cavity (Fig. 6b,f). Another partially  
33 preserved septa extends across the dorsal and ventral portions and overlies the cavity, and  
34 probably forms the interior boundaries of this cavity (Fig. 6g); thus, the cavities appear to be  
35 dorsoventrally elongate but anteroposteriorly narrow. The cavities are delimited  
36 mediolaterally by septa, approximately 1–2 mm thick, that radiate dorsolaterally from the  
37 ventromedial margin of the centrum, such that the cavities become broader towards the  
38 dorsal surface of the centrum. These cavities are interpreted to form part of a system of  
39 internal camerae that extend along the length of the centrum.  
40  
41  
42  
43  
44  
45  
46  
47  
48  
49

50 Megaraptora Benson, Carrano and Brusatte, 2010

51  
52  
53 Megaraptora indet.  
54  
55  
56  
57  
58  
59  
60

## Material

AM F112816 is a mid-caudal vertebral centrum and was recovered from Vertical Bill's near Three Mile, approximately 3 km south-southwest of Lightning Ridge Fig. 1.

## Preservation

The articular ends and the bases of the exposed neural arch pedicels have been eroded, the anterior more strongly than the posterior; the neural arch is missing.

## Description

Both articular surfaces of AM F112816 are subtriangular, reaching their widest point dorsally and tapering to a blunt point ventrally (Fig. 7b,e). The articular surfaces are flat to slightly concave. In lateral view, the ventral surface of the centrum is slightly concave and the anterior articular surface is slightly elevated dorsally with respect to the posterior surface (Fig. 7a,d); however, this is probably a result of erosional loss of the ventral rim of the articular surface. The posteroventral surface of the centrum is bevelled to form a chevron articular facet, indicating that it comes from the caudal series. The lateral surfaces of the centrum are slightly concave anteroposteriorly and convex dorsoventrally, the lateral surfaces of the centrum converging ventrally to form a well-defined keel (Fig. 7f). Erosion of the articular and dorsolateral surfaces of the centrum exposes large areas of well-defined polygonal cavities delimited by thin septa within the centrum, representative of camellate pneumaticity. The right surface of the centrum is pierced by two anterior and posterior pneumatic foramina (Fig. 7a). The posterior foramina is subdivided by a thin anterodorsally-oriented lamina. There are no pneumatic foramina on the left side of the centrum.

## Discussion

LRF 3310–3312 is identified as a theropod primarily due to the presence of hyposphenohypantrum articulations in the anterior caudal vertebrae, dorsoventrally compressed transverse processes elevated above the dorsal margin of the vertebral centra, weakly developed vertebral laminae and fossae, and camellate internal composition of the vertebral centra.

1  
2 The only Australian non-theropod dinosaurs with preserved axial and pelvic elements of  
3 comparable size to LRF 3310–3312 are the basal ornithopod *Muttaborrasaurus* from the  
4 Albian Mackunda Formation [56] and the titanosauriform sauropods *Wintonotitan wattsi*  
5 [11,57] and *Savannasaurus elliottorum* [58] from the upper Albian–Turonian Winton  
6 Formation, all from Queensland. The anterior caudal vertebrae of *Muttaborrasaurus* differ  
7 from LRF 3310 and LRF 3311 (aside from the lack of camellate internal composition of the  
8 centrum in the former) in the considerably less well-developed mediolateral compression of  
9 the centra at mid-length, and the presence of paired ventrolateral ridges on the centrum that  
10 extend between the anterior articular facet and the posterior chevron facet, delimiting a well-  
11 defined mid-line groove [56]. The anterior caudal centra of *Wintonotitan* have anterior and  
12 posterior articular surfaces that are dorsoventrally compressed, a feature common to most  
13 neosauropods (Poropat et al., 2015a) and unlike the subcircular surfaces of LRF 3310 and LRF  
14 3312. In addition, *Wintonotitan* has anterior cervical vertebrae with a solid internal texture  
15 and that lack a hyosphene-hypantrum system [57]; this contrasts respectively with the  
16 presence of camellate internal structure and a hyosphene in LRF 3310. The anterior-most  
17 caudal centra of *Savannasaurus* have pneumatic fossae [58], a feature that is absent on LRF  
18 3310 and LRF 3311. The robust trapezoidal element LRF 3312 does not resemble part of any  
19 of the peduncles, or any other part of, the pelvic elements of *Muttaborrasaurus* [56], and is  
20 unlike the more rounded pubic and ischial articulations of the ilium in *Diamantinasaurus* [59].  
21  
22  
23  
24  
25  
26  
27  
28  
29  
30  
31  
32  
33  
34  
35

36 A position within the caudal series of the vertebral column for LRF 3310 is inferred based on  
37 the weak development of laminae and fossae, contrasting with the cervical and dorsal  
38 vertebrae of theropods and sauropodomorphs where these features are better developed  
39 [54] and the lack of any evidence of sacral rib attachments. Within the caudal series, the  
40 presence of a robust transverse process, the anteroposteriorly short centrum in relation to its  
41 dorsoventral height and the absence of a facet for the articulation of the chevron implies an  
42 anteriormost position. Similarly, LRF 3311 is identified as an anterior caudal vertebra—in a  
43 more posterior position than LRF 3310—based on the presence of a posterior chevron facet;  
44 the isolated centrum AM F112816 is identified as a caudal vertebra for the same reason. As  
45 mentioned previously, LRF 3310–3312 are considered to belong to a single individual. The  
46 mediolateral width of the pubic peduncle of the ilium (LRF 3312) relative to the mediolateral  
47 width of the posterior face of the anteriormost caudal centrum (LRF 3310) is within the range  
48  
49  
50  
51  
52  
53  
54  
55  
56  
57  
58  
59  
60

1  
2 of variation when compared with other averostran theropods (Table 2), providing additional  
3 justification for the close association of the aforementioned elements. The incomplete  
4 preservation of AM F106524 and AM F106525 precludes an accurate determination of their  
5 placement within the vertebral column.  
6  
7  
8

9  
10 The rounded ventral surface of LRF 3310 contrasts with the keeled ventral surface of LRF  
11 3311. In some theropods, the anteriormost caudals have a flattened or gently curved ventral  
12 surface that differs from the condition in more posterior caudals in which a ventral groove or  
13 keel may be present [55,64]. The presence of a single ventral keel in the anterior caudal  
14 vertebrae is a synapomorphy of neovenatorid allosauroids, but it also appears independently  
15 in carcharodontosaurids, abelisaurids, and megalosaurids [48,65,66]. The anterior caudal  
16 vertebrae of most other theropods bear a ventral groove bounded by well-defined ridges  
17 [55,62,67–69], while others lack either a keel or a groove [70].  
18  
19  
20  
21  
22  
23

24  
25 The small circular central convexity on the posterior articular surface of LRF 3310 and AM  
26 F106525 appears to represent a genuine feature and not a taphonomic artefact. In both  
27 centra, the convexity occupies a similar proportion of the mediolateral width of the articular  
28 surface (approximately 31 and 27 percent respectively). Within theropods, similar convex  
29 features have been described in megalosauroid tetanurans: the posterior surface of the  
30 twelfth dorsal vertebra of the Early Cretaceous Asian spinosaurid *Ichthyovenator* [61]; and the  
31 posterior surface of an anterior caudal centrum of the Late Jurassic European megalosaurid  
32 *Torvosaurus gurneyi* [71]. In both taxa, the edges of the convex feature are continuous with  
33 the the surrounding articular surface as opposed to distinctly elevated from the articular  
34 surface as in LRF 3310. Furthermore, the convex features of *Ichthyovenator* and *T. gurneyi* are  
35 more distinctly rounded in comparison to the features on LRF 3310 and AM F106525. The  
36 variable development (in terms of their relative size and shape) of convex features on  
37 centrum articular surfaces advocates for their independent development in each taxon;  
38 therefore this feature is likely to be of little diagnostic utility. However, due to the rarity of  
39 such features among theropods, this feature is likely to be autapomorphic for the Lightning  
40 Ridge taxon. As this feature is uncommon within theropods—and dinosaurs more broadly—  
41 its presence in both LRF 3310 and AM F106525 is tentatively interpreted as an indication of  
42 close affinities between the two specimens.  
43  
44  
45  
46  
47  
48  
49  
50  
51  
52  
53  
54  
55  
56  
57  
58  
59  
60

1  
2 Anterior caudal neural spines that are mediolaterally narrow and anteroposteriorly short,  
3 restricted to the posterior part of the neural arch and extend to or partially overhang the  
4 posterior articular surface are present in many tetanuran theropods, including  
5 megalosauroids [68,72], allosauroids [64,73] and coelurosaurs [70,74]. This differs from the  
6 spinosaurid condition in which the anteriormost caudals support the distal part of the sail and  
7 have robust neural spines that approach the anteroposterior length of their respective centra  
8 [75]. As a consequence of the posterior position of the neural spine, many of the  
9 aforementioned taxa also have postzygapophyses that are situated at the base of the neural  
10 spine and overhang the posterior articular surface [70]. In most theropods, the anteriormost  
11 caudals have postzygapophyseal facets that are angled at greater than a 40 degree angle from  
12 the horizontal [67,76,77]; however, a few taxa—including LRF 3310–3312—have  
13 postzygapophyseal facets that are angled more shallowly, or lie essentially horizontally  
14 [70,73,78,79].

25 Accessory hyposphene-hypantrum articulations are present in the anterior caudal series of  
26 many theropods, particularly basal tetanurans [55,64,70,77,78,80,81] and LRF 3310–3312,  
27 but are absent in many theropod lineages [62,67,73]. In abelisaurids and tyrannosauroids,  
28 hyposphene-hypantrum accessory articulations are well-developed in the anterior caudals,  
29 and may extend into the mid-caudal series [66,70,82].

35 In LRF 3310, the preserved base of the transverse process projects essentially horizontally  
36 from the neural arch, a characteristic of most theropods with the exception of abelisaurids  
37 and some basal tetanurans in which the transverse processes of caudal vertebrae typically are  
38 inclined from the horizontal by at least 20 degrees, and sometimes as much as 40 degrees or  
39 more [66]. The transverse processes of caudal vertebrae are distinctly ventrolaterally  
40 oriented [83].

46 An internal structure of the vertebrae consisting of a large number of irregularly-shaped  
47 chambers delimited by thin septa is termed camellate [84] and is present in some ceratosaurs  
48 [85], carcharodontosaurian allosauroids [50,60,64,73] and coelurosaurs [86]. However, some  
49 carcharodontosaurian theropods may also present vertebrae with the plesiomorphic  
50 condition of a smaller number of larger chambers with thicker septa, defined as a camerate  
51 structure and present predominantly in basal tetanurans [84,87]. In these taxa, camerate and  
52



1  
2 camellate internal structure may be present within the centrum and neural arch of a single  
3 vertebra respectively [88], or serially within the vertebral centra of a single individual [50].  
4 The internal structure of LRF 3310 and AM F112816 differs from that of AM F106525 in that  
5 the centrum of the former two are at least partially camellate and composed of small  
6 polygonal chambers with thin septa, whereas the preserved centrum of the lattermost is  
7 camerate with large, dorsoventrally elongated chambers with relatively thicker septa.  
8  
9  
10  
11  
12

13 Within the axial skeleton, unambiguous pneumaticity in the caudal series, in which pneumatic  
14 foramina communicate with internal chambers of the centra, is observed in megaraptorans  
15 [50,60], the megalosaurid *Torvosaurus tanneri* [89], the carcharodontosaurid  
16 *Carcharodontosaurus* [79] and some coelurosaurs [2]. Among neotheropods, axial  
17 pneumaticity is ancestrally present in the postaxial cervical and anterior dorsal vertebrae and  
18 represents the 'common pattern' of [2]. This may be augmented to form the 'extended pattern'  
19 by the uninterrupted progression of unambiguous pneumatic features anteriorly into the  
20 atlas-axis and/or posteriorly into the posterior dorsal, sacral, and caudal vertebrae [2]. In AM  
21 F112816, both pneumatic foramina and camellae are present, this indicating the presence of  
22 unambiguous pneumaticity in a mid-caudal centrum. Pneumaticity extending posteriorly to the  
23 middle caudal centra has so far only been reported in megaraptorids [60] and  
24 oviraptorosaurs [90–92]. In LRF 3310, there is evidence for pneumaticity associated with the  
25 neural spine, whereas pneumatic fossae or foramina are absent from the lateral surfaces of  
26 the centrum. This appears to correspond to the development of axial pneumaticity first in the  
27 neural arch followed by the centra as documented in the posteriorward progression of the  
28 'extended pattern' [2]. In addition, from the presence of caudal neural arch pneumaticity it can  
29 therefore be inferred that the posterior dorsal and sacral vertebrae of the individual to which  
30 LRF 3310 pertains were also pneumatic. Unambiguous pneumatic fossae have been  
31 documented associated with the neural spine in the abelisauroid *Majungasaurus* [62,93]. A  
32 fossa at the base of the neural arch of an anterior caudal vertebra from a referred specimen of  
33 *Acrocanthosaurus* was described as regarded as pneumatic [84]; however, a subsequent study  
34 did not identify pneumatic anterior caudal vertebrae in this taxon [2]. Imperforate neural arch  
35 fossae in anterior caudals were also described from another specimen of *Acrocanthosaurus*  
36 [73]. Variably-developed blind neural spine fossae have also been reported in *Alioramus altai*,  
37 *Monolophosaurus* and *Garudimimus* [70,94–96]. Differences in the development of this feature  
38  
39  
40  
41  
42  
43  
44  
45  
46  
47  
48  
49  
50  
51  
52  
53  
54  
55  
56  
57  
58  
59  
60

1  
2 on the anterior caudals of *Alioramus altai* may imply ontogenetic or individual variation,  
3 consistent with apneumatic functions such as the sites of axial musculature attachments or fat  
4 deposits [70,93].

7  
8 The subtriangular pubic peduncle of the ilium is similar in appearance to that of known ilia  
9 from megaraptoran allosauroids. The lateral surface bearing fine parallel striations is  
10 interpreted as the attachment site of connective tissue between the pubic peduncle and the  
11 pubis; such striations with this inferred function have also been observed on the pubic  
12 peduncles of megaraptorans [19,60]. The peduncle appears to be solid with no indication of  
13 pneumaticity visible on the lateral surface or in cross-section on the broken dorsal surface.  
14 This contrasts with the condition of neovenatorid allosauroids (including megaraptorans) in  
15 which pneumatic chambers penetrate the ilia through the medial surface, the brevis fossa,  
16 and/or the pubic peduncle [19,48,60]. In LRF 3312, the anteroposterior length of the ventral  
17 surface of the pubic peduncle is approximately twice the mediolateral width, similar to that  
18 reported for carcharodontosaurian allosauroids, and which is intermediate between the  
19 relatively shorter pubic peduncles of non-allosaurian tetanurans and the longer ones of  
20 coelurosaurs Table 2, [18].

21  
22 On the basis of the characters discussed above, LRF 3310–3312 presents a combination of  
23 characters that are commonly observed in carcharodontosaurian allosauroids: camellae in the  
24 caudal centra, a ventral keel on the anterior caudal centra and a pubic peduncle  
25 approximately twice as long anteroposteriorly as mediolaterally wide [48]. This hypothesis is  
26 supported by the inclusion of LRF 3310–3312 into a phylogenetic dataset which resulted in  
27 the former two characters representing unambiguous synapomorphies of a polytomy  
28 containing exclusively carcharodontosaurian allosauroids (Supplementary Figure 1); inclusion  
29 in a secondary matrix with a less inclusive sampling of characters and taxa hypothesises more  
30 general allosauroid affinities (Supplementary Figure 2). In addition, LRF 3310 and AM  
31 F106525 both have in common a central convexity on the articular surface of the centrum, an  
32 uncommon feature among theropods. The shared presence of this unusual characteristic in  
33 both vertebrae, together with their relative proximity to each other suggests that they may  
34 pertain to the same taxon, or similar taxa, of carcharodontosaurian allosauroid. The  
35 differences in internal structure of LRF 3310 and AM F106525 would not preclude the  
36  
37  
38  
39  
40  
41  
42  
43  
44  
45  
46  
47  
48  
49  
50  
51  
52  
53  
54  
55  
56  
57  
58  
59  
60

1  
2 possibility of a close relationship as there is well-documented variation in vertebral internal  
3 composition within individual carcharodontosaurian taxa.  
4

5  
6 Among Australian megaraptorids, the pubic peduncle of LRF 100–106 bears a pneumatic  
7 internal composition; the fragment of the main body of the ilium in *Australovenator* shows  
8 evidence of pneumaticity [11], but it is not known if the pubic peduncle was pneumatic. As  
9 there is no indication of pneumaticity in LRF 3312, it is therefore distinguishable from LRF  
10 100–106. The absence of any vertebral material from either LRF 100–106 or *Australovenator*  
11 unfortunately limits the extent to which any additional direct comparisons between the three  
12 taxa can be made. **However, the pervasive development of both pelvic and caudal**  
13 **pneumaticity among megaraptorids [60] indicates that LRF 3310–3312 most likely does not**  
14 **pertain to this theropod clade.**   
15  
16  
17  
18  
19  
20  
21  
22

23 AM F112816 most likely pertains to a megaraptoran, primarily on the basis of pneumaticity  
24 within a mid-caudal centra. The only other theropod clade in which pneumatic mid-caudal  
25 vertebrae have been reported, Oviraptorosauria, is unlikely to be a candidate for the affinities  
26 of this centrum as the group is likely to have been entirely absent from Gondwana. Restudy of  
27 previous material referred to Oviraptorosauria from South America [97,98] has concluded  
28 that they are representative of noosaurids and megaraptorans respectively [99,100].  
29  
30  
31  
32  
33

34 To date, a majority of the material of Australian apex theropod predators has been referred to  
35 Megaraptora [2,5,19,48]. Recently, the Victorian Otway and Gippsland groups have yielded  
36 individual specimens interpreted as representatives of other medium and large-sized  
37 theropod clades, including a tyrannosauroid pubis, a spinosaurid cervical vertebra, and a  
38 ceratosaurian astragalocalcaneum [6–8]. The diagnoses for each of these remains were  
39 subsequently disputed, with the tyrannosauroid pubis interpreted as either an indeterminate  
40 tetanuran or possible megaraptoran, [9,10], and the spinosaurid and ceratosaurian specimens  
41 as indeterminate averostrans [10]. While a re-evaluation of the problematic Victorian  
42 material is beyond the scope of this present study, it is noted that if the interpretation of LRF  
43 3310–3312 is correct, then this specimen represents additional evidence for a non-  
44 megaraptoran Australian Cretaceous theropod, and the only one that has been described from  
45 associated skeletal elements.  
46  
47  
48  
49  
50  
51  
52  
53  
54  
55  
56  
57  
58  
59  
60

## Conclusion

New associated and isolated material from the Upper Cretaceous Griman Creek Formation expands the diversity of theropods currently recognised from this stratigraphic interval. LRF 3310–3312, tentatively grouped together with AM F106524–106525, represents a second medium-sized carcharodontosaurian theropod from Lightning Ridge, distinct from the megaraptorid LRF 100–106, and is only the third Australian theropod recognised from associated material. AM F112816 is identified as a megaraptorid mid-caudal vertebra due to the presence of pneumatic foraminae and camellate internal structure, and is the first reported axial skeletal element of such a theropod recognised from Lightning Ridge.

## Data Accessibility

Supplementary information has been provided as the electronic supplementary material.

## Authors' Contributions

T.B. and P.R.B. conceived the study; T.B. wrote the manuscript; P.R.B. and E.S. helped draft the manuscript; T.B. and E.S. collected measurements; T.B. performed analyses. All authors gave final approval for publication.

## Competing Interests

We declare we have no competing interests.

## Funding

TB was funded by a Research Training Program scholarship. PRB was funded under an Australian Research Council Discovery Early Career Researcher Award (project ID: DE170101325).

## Research Ethics

No ethics approval was required prior to conducting this research.

## Animal Ethics

No ethics approval was required prior to conducting this research.

## Permission to carry out fieldwork

The material described in this research was deposited in museum collections. No fieldwork was undertaken prior to conducting this research.

## Acknowledgements

LRF 3300–3312 were gifted to the Australian Opal Centre by one of the authors (ES). Jenni Brammall, Manager of the Australian Opal Centre, is also thanked for allowing access to the specimens and providing resources to facilitate their study while in Lightning Ridge. Matthew McCurry of the Australian Museum is thanked for allowing access to material under his care. TNT is made available thanks to a subsidy from the Willi Hennig Society. We acknowledge the Yuwaalaraay, and Gamilaraay peoples, traditional owners of Lightning Ridge country.

## References

1. Agnolín FL, Ezcurra MD, Pais DF, Salisbury SW. 2010 A reappraisal of the Cretaceous non-avian dinosaur faunas from Australia and New Zealand: Evidence for their Gondwanan affinities. *Journal of Systematic Palaeontology* **8**, 257–300. (doi:[10.1080/14772011003594870](https://doi.org/10.1080/14772011003594870))
2. Benson RBJ, Rich TH, Vickers-Rich P, Hall M. 2012 Theropod fauna from southern Australia indicates high polar diversity and climate-driven dinosaur provinciality. *PLoS ONE* **7**, e37122. (doi:[10.1371/journal.pone.0037122](https://doi.org/10.1371/journal.pone.0037122))
3. Molnar RE, Flannery TF, Rich THV. 1981 An allosaurid theropod dinosaur from the Early Cretaceous of Victoria, Australia. *Alcheringa: An Australasian Journal of Palaeontology* **5**, 141–146. (doi:[10.1080/03115518108565427](https://doi.org/10.1080/03115518108565427))
4. Rich TH, Vickers-Rich P. 1994 Neoceratopsians and ornithomimosaur: Dinosaurs of Gondwana origin? *Research and Exploration* **10**, 129–131.

- 1  
2 5. Smith ND, Makovicky PJ, Agnolin FL, Ezcurra MD, Pais DF, Salisbury SW. 2008 A  
3 *Megaraptor*-like theropod (Dinosauria: Tetanurae) in Australia: Support for faunal exchange  
4 across eastern and western Gondwana in the Mid-Cretaceous. *Proceedings of the Royal Society*  
5 *B: Biological Sciences* **275**, 2085–2093. (doi:[10.1098/rspb.2008.0504](https://doi.org/10.1098/rspb.2008.0504))  
6  
7
- 8  
9 6. Benson RBJ, Barrett PM, Rich TH, Vickers-Rich P. 2010 A southern tyrant reptile. *Science*  
10 **327**, 1613–1613. (doi:[10.1126/science.1187456](https://doi.org/10.1126/science.1187456))  
11  
12
- 13  
14 7. Barrett PM, Benson RBJ, Rich TH, Vickers-Rich P. 2011 First spinosaurid dinosaur from  
15 Australia and the cosmopolitanism of Cretaceous dinosaur faunas. *Biology Letters* **7**, 933–936.  
16 (doi:[10.1098/rsbl.2011.0466](https://doi.org/10.1098/rsbl.2011.0466))  
17  
18
- 19  
20 8. Fitzgerald EMG, Carrano MT, Holland T, Wagstaff BE, Pickering D, Rich TH, Vickers-Rich P.  
21 2012 First ceratosaurian dinosaur from Australia. *Naturwissenschaften* **99**, 397–405.  
22 (doi:[10.1007/s00114-012-0915-3](https://doi.org/10.1007/s00114-012-0915-3))  
23  
24
- 25  
26 9. Herne MC, Nair JP, Salisbury SW. 2010 Comment on ‘A southern tyrant reptile’. *Science* **329**,  
27 1013–1013.  
28  
29
- 30  
31 10. Novas FE, Agnolín FL, Ezcurra MD, Porfiri J, Canale JI. 2013 Evolution of the carnivorous  
32 dinosaurs during the Cretaceous: The evidence from Patagonia. *Cretaceous Research* **45**, 174–  
33 215. (doi:[10.1016/j.cretres.2013.04.001](https://doi.org/10.1016/j.cretres.2013.04.001))  
34  
35
- 36  
37 11. Hocknull SA, White MA, Tischler TR, Cook AG, Calleja ND, Sloan T, Elliott DA. 2009 New  
38 mid-Cretaceous (latest Albian) dinosaurs from Winton, Queensland, Australia. *PLoS ONE* **4**,  
39 e6190. (doi:[10.1371/journal.pone.0006190](https://doi.org/10.1371/journal.pone.0006190))  
40  
41
- 42  
43 12. White MA, Bell PR, Cook AG, Poropat SF, Elliott DA. 2015 The dentary of *Australovenator*  
44 *Wintonensis* (Theropoda, Megaraptoridae); implications for megaraptorid dentition. *PeerJ* **3**,  
45 e1512. (doi:[10.7717/peerj.1512](https://doi.org/10.7717/peerj.1512))  
46  
47
- 48  
49 13. White MA, Cook AG, Hocknull SA, Sloan T, Sinapius GHK, Elliott DA. 2012 New forearm  
50 elements discovered of holotype specimen *Australovenator Wintonensis* from Winton,  
51 Queensland, Australia. *PLoS ONE* **7**, e39364. (doi:[10.1371/journal.pone.0039364](https://doi.org/10.1371/journal.pone.0039364))  
52  
53  
54  
55  
56  
57  
58  
59

- 1  
2 14. White MA *et al.* 2013 New *Australovenator* hind limb elements pertaining to the holotype  
3 reveal the most complete neovenatorid leg. *PLoS ONE* **8**, e68649.  
4  
5 (doi:[10.1371/journal.pone.0068649](https://doi.org/10.1371/journal.pone.0068649))  
6
- 7  
8 15. Dettmann ME *et al.* 1992 Australian Cretaceous terrestrial faunas and floras:  
9 Biostratigraphic and biogeographic implications. *Cretaceous Research* **13**, 207–262.  
10
- 11  
12 16. Smith ET. 1999 *Black opal fossils of Lightning Ridge: Treasures from the rainbow billabong*.  
13 East Roseville: Kangaroo Press, Simon & Schuster Australia.  
14
- 15  
16 17. Huene F von. 1932 Die fossile Reptil-Ordnung Saurischia, ihre Entwicklung und  
17 Geschichte. *Monographien zue Geologie und Palaeontologie* **1**, 1–371.  
18
- 19  
20 18. Carrano MT, Benson RBJ, Sampson SD. 2012 The phylogeny of Tetanurae (Dinosauria:  
21 Theropoda). *Journal of Systematic Palaeontology* **10**, 211–300.  
22  
23 (doi:[10.1080/14772019.2011.630927](https://doi.org/10.1080/14772019.2011.630927))  
24
- 25  
26 19. Bell PR, Cau A, Fanti F, Smith ET. 2016 A large-clawed theropod (Dinosauria: Tetanurae)  
27 from the Lower Cretaceous of Australia and the Gondwanan origin of megaraptorid  
28 theropods. *Gondwana Research* **36**. (doi:[10.1016/j.gr.2015.08.004](https://doi.org/10.1016/j.gr.2015.08.004))  
29
- 30  
31 20. Burger D. 1980 Palynology of the Lower Cretaceous in the Surat Basin. *Bureau of Mineral*  
32 *Resources, Geology and Geophysics, Australia, Bulletin* **189**, 1–106.  
33
- 34  
35 21. Green PM, Carmichael DC, Brain TJ, Murray CG, KcKellar JL, Beeston JW, Gray ARG. 1997  
36 Lithostratigraphic units in the Bowen and Surat basins, Queensland. In *The Surat and Bowen*  
37 *Basins of South-east Queensland*, pp. 41–108. Queensland Department of Mines and Energy.  
38
- 39  
40 22. Byrnes JG. 1977 Notes on the Rolling Downs Group in the Milparinka, White Cliffs and  
41 Angledool 1:250,000 sheet areas. *Geological Survey of New South Wales Report* **GS1977/005**,  
42 1–17.  
43
- 44  
45 23. Molnar RE, Willis PMA. 2000 New crocodyliform material from the Early Cretaceous  
46 Grimman Creek Formation, at Lightning Ridge, New South Wales. In *Crocodylian Biology and*  
47 *Evolution* (eds GC Grigg, F Seebacher, CE Franklin), pp. 75–82. Chipping Norton: Surrey Beatty  
48 & Sons.  
49

- 1  
2 24. Clemens WA, Wilson GP, Molnar RE. 2003 An enigmatic (synapsid?) tooth from the Early  
3 Cretaceous of New South Wales, Australia. *Journal of Vertebrate Paleontology* **23**, 232–237.  
4 (doi:[10.1671/0272-4634\(2003\)23\[232:AESTFT\]2.0.CO;2](https://doi.org/10.1671/0272-4634(2003)23[232:AESTFT]2.0.CO;2))  
5  
6  
7  
8 25. Raza A, Hill KC, Korsch RJ. 2009 Mid-Cretaceous uplift and denudation of the Bowen and  
9 Surat Basins, eastern Australia: Relationship to Tasman Sea rifting from apatite fission-track  
10 and vitrinite-reflectance data. *Australian Journal of Earth Sciences* **56**, 501–531.  
11 (doi:[10.1080/08120090802698752](https://doi.org/10.1080/08120090802698752))  
12  
13  
14  
15  
16 26. Tucker RT, Roberts EM, Hu Y, Kemp AIS, Salisbury SW. 2013 Detrital zircon age  
17 constraints for the Winton Formation, Queensland: Contextualizing Australia's Late  
18 Cretaceous dinosaur faunas. *Gondwana Research* **24**, 767–779. (doi:[10.1016/j.gr.2012.12.009](https://doi.org/10.1016/j.gr.2012.12.009))  
19  
20  
21  
22 27. Etheridge R. 1917 Reptilian notes: *Megalania Prisca* Owen and *Notiosaurus Dentatus*  
23 Owen; lacertilian dermal armour; opalized remains from Lightning Ridge. *Proceedings of the*  
24 *Royal Society of Victoria* **29**, 128–133.  
25  
26  
27  
28 28. Molnar RE. 1980 Procoelous crocodile from the Lower Cretaceous of Lightning Ridge.  
29 *Memoirs of the Queensland Museum* **20**, 65–75.  
30  
31  
32  
33 29. Archer M, Flannery TF, Ritchie A, Molnar RE. 1985 First Mesozoic mammal from  
34 Australia—an early Cretaceous monotreme. *Nature* **318**, 363–366. (doi:[10.1038/318363a0](https://doi.org/10.1038/318363a0))  
35  
36  
37 30. Rich TH, Rich PV, Wagstaff BE, McEwen-Mason J, Douthitt CB, Gregory RT. 1989 Early  
38 Cretaceous biota from the northern side of the Australo-Antarctic rift valley. In *Origins and*  
39 *evolution of the Antarctic biota* (ed JA Crame), pp. 121–130.  
40  
41  
42  
43 31. Flannery TF, Archer M, Rich TH, Jones R. 1995 A new family of monotremes from the  
44 Cretaceous of Australia. *Nature* **377**, 418–420. (doi:[10.1038/377418a0](https://doi.org/10.1038/377418a0))  
45  
46  
47 32. Molnar RE, Galton PM. 1986 Hypsilophodontid dinosaurs from Lightning Ridge, New  
48 South Wales, Australia. *Geobios* **19**, 231–239.  
49  
50  
51  
52 33. Bell PR, Burns ME, Smith ET. 2017 A probable ankylosaurian (Dinosauria, Thyreophora)  
53 from the Early Cretaceous of New South Wales, Australia. *Alcheringa: An Australasian Journal*  
54 *of Palaeontology* **0**, 1–5. (doi:[10.1080/03115518.2017.1384851](https://doi.org/10.1080/03115518.2017.1384851))  
55  
56  
57  
58  
59  
60



- 1  
2 34. Molnar RE, Salisbury SW. 2005 Observations on Cretaceous sauropods from Australia. In  
3 *Thunder Lizards - The sauropodomorph dinosaurs* (eds V Tidwell, K Carpenter), pp. 454–465.  
4 Bloomington: Indiana University Press.  
5  
6  
7  
8 35. White MA, Falkingham PL, Cook AG, Hocknull SA, Elliott DA. 2013 Morphological  
9 comparisons of metacarpal I for *Australovenator Wintonensis* and *Rapator Ornitholestoides*:  
10 Implications for their taxonomic relationships. *Alcheringa: An Australasian Journal of*  
11 *Palaeontology* **37**, 435–441. (doi:[10.1080/03115518.2013.770221](https://doi.org/10.1080/03115518.2013.770221))  
12  
13  
14  
15  
16 36. Molnar RE. 1999 Avian tibiotarsi from the Early Cretaceous of Lightning Ridge, New South  
17 Wales. In *Proceedings of the Second Gondwana Dinosaur Symposium* (eds Y Tomida, TH Rich, P  
18 Vickers-Rich), pp. 197–209. National Science Museum Monographs.  
19  
20  
21  
22 37. Brougham T, Smith ET, Bell PR. 2017 Isolated teeth of Anhangueria (Pterosauria:  
23 Pterodactyloidea) from the Lower Cretaceous of Lightning Ridge, New South Wales, Australia.  
24 *PeerJ* **5**, e3256. (doi:[10.7717/peerj.3256](https://doi.org/10.7717/peerj.3256))  
25  
26  
27  
28 38. Kear BP. 2006 Plesiosaur remains from Cretaceous high-latitude non-marine deposits in  
29 southeastern Australia. *Journal of Vertebrate Paleontology* **26**, 196–199.  
30  
31  
32  
33 39. Smith ET. 2010 Early Cretaceous chelids from Lightning Ridge, New South Wales.  
34 *Alcheringa: An Australasian Journal of Palaeontology* **34**, 375–384.  
35 (doi:[10.1080/03115518.2010.488117](https://doi.org/10.1080/03115518.2010.488117))  
36  
37  
38  
39 40. Smith ET, Kear BP. 2013 *Spoochelys ormondea* gen. et sp. nov., an archaic meiolaniid-like  
40 turtle from the Early Cretaceous of Lightning Ridge, Australia. In *Morphology and Evolution of*  
41 *Turtles* (eds DB Brinkman, PA Holroyd, JD Gardner), pp. 121–146. Dordrecht: Springer  
42 Netherlands.  
43  
44  
45  
46 41. Kemp A, Molnar RE. 1981 *Neoceratodus forsteri* from the Lower Cretaceous of New South  
47 Wales, Australia. *Journal of Paleontology* **55**, 211–217.  
48  
49  
50  
51 42. Kemp A. 1993 *Ceratodus diutinus*, a new ceratodont from Cretaceous and Late Oligocene–  
52 Medial Miocene deposits in Australia. *Journal of Paleontology* **67**, 883–888.  
53 (doi:[10.1017/S0022336000037148](https://doi.org/10.1017/S0022336000037148))  
54  
55  
56  
57  
58  
59  
60

- 1  
2 43. Kemp A. 1997 A revision of Australian Mesozoic and Cenozoic lungfish of the family  
3 Neoceratodontidae (Osteichthyes:Dipnoi), with a description of four new species. *Journal of*  
4 *Paleontology* **71**, 713–733.  
5  
6  
7  
8 44. Hocknull SA. 2000 Mesozoic freshwater and estuarine bivalves from Australia. *Memoirs of*  
9 *the Queensland Museum* **45**, 405–426.  
10  
11  
12 45. Kear BP, Godthelp H. 2008 Inferred vertebrate bite marks on an Early Cretaceous unionoid  
13 bivalve from Lightning Ridge, New South Wales, Australia. *Alcheringa: An Australasian Journal*  
14 *of Palaeontology* **32**, 65–71. (doi:[10.1080/03115510701757498](https://doi.org/10.1080/03115510701757498))  
15  
16  
17  
18 46. Hamilton-Bruce RJ, Kear BP. 2010 A possible succineid land snail from the Lower  
19 Cretaceous non-marine deposits of the Griman Creek Formation at Lightning Ridge, New  
20 South Wales. *Alcheringa: An Australasian Journal of Palaeontology* **34**, 325–331.  
21  
22 (doi:[10.1080/03115511003723279](https://doi.org/10.1080/03115511003723279))  
23  
24  
25  
26 47. Stewart AJ, Raymond OL, Totterdell JM, Zhang W, Gallagher R. 2013 *Australian Geological*  
27 *Provinces, 2013.01 edition (Digital Dataset)*. Canberra: Geoscience Australia, Commonwealth of  
28 Australia. See <http://www.ga.gov.au>.  
29  
30  
31  
32 48. Benson RBJ, Carrano MT, Brusatte SL. 2010 A new clade of archaic large-bodied predatory  
33 dinosaurs (Theropoda: Allosauroidea) that survived to the latest Mesozoic.  
34 *Naturwissenschaften* **97**, 71–78. (doi:[10.1007/s00114-009-0614-x](https://doi.org/10.1007/s00114-009-0614-x))  
35  
36  
37  
38 49. Novas FE, Aranciaga Rolando AM, Agnolín FL. 2016 Phylogenetic relationships of the  
39 Cretaceous Gondwanan theropods *Megaraptor* and *Australovenator*: The evidence afforded by  
40 their manual anatomy. *Memoirs of Museum Victoria* **74**, 49–61.  
41  
42  
43  
44 50. Porfiri JD, Novas FE, Calvo JO, Agnolín FL, Ezcurra MD, Cerda IA. 2014 Juvenile specimen of  
45 *Megaraptor* (Dinosauria, Theropoda) sheds light about tyrannosauroid radiation. *Cretaceous*  
46 *Research* **51**, 35–55. (doi:[10.1016/j.cretres.2014.04.007](https://doi.org/10.1016/j.cretres.2014.04.007))  
47  
48  
49  
50 51. Apesteguía S, Smith ND, Valieri RJ, Makovicky PJ. 2016 An unusual new theropod with a  
51 didactyl manus from the Upper Cretaceous of Patagonia, Argentina. *PLOS ONE* **11**, e0157793.  
52  
53 (doi:[10.1371/journal.pone.0157793](https://doi.org/10.1371/journal.pone.0157793))  
54  
55  
56  
57  
58  
59  
60

- 1  
2 52. Brusatte SL, Carr TD. 2016 The phylogeny and evolutionary history of tyrannosauroid  
3 dinosaurs. *Scientific Reports* **6**, 20252. (doi:[10.1038/srep20252](https://doi.org/10.1038/srep20252))  
4  
5  
6 53. Wilson JA. 1999 A nomenclature for vertebral laminae in sauropods and other saurischian  
7 dinosaurs. *Journal of Vertebrate Paleontology* **19**, 639–653.  
8  
9 (doi:[10.1080/02724634.1999.10011178](https://doi.org/10.1080/02724634.1999.10011178))  
10  
11  
12 54. Wilson JA, D’Emic MD, Ikejiri T, Moacdieh EM, Whitlock JA. 2011 A nomenclature for  
13 vertebral fossae in sauropods and other saurischian dinosaurs. *PLoS ONE* **6**, e17114.  
14  
15 (doi:[10.1371/journal.pone.0017114](https://doi.org/10.1371/journal.pone.0017114))  
16  
17  
18 55. Currie PJ, Zhao X-J. 1993 A new carnosaur (Dinosauria, Theropoda) from the Jurassic of  
19 Xinjiang, People’s Republic of China. *Can. J. Earth Sci.* **30**, 2037–2081. (doi:[10.1139/e93-179](https://doi.org/10.1139/e93-179))  
20  
21  
22  
23 56. Bartholomai A, Molnar RE. 1981 Muttaborrasaurus, a new iguanodontid (Ornithischia:  
24 Ornithopoda) dinosaur from the Lower Cretaceous of Queensland. *Memoirs of the Queensland*  
25 *Museum* **20**, 319–349.  
26  
27  
28  
29 57. Poropat SF, Mannion PD, Upchurch P, Hocknull SA, Kear BP, Elliott DA. 2015 Reassessment  
30 of the non-titanosaurian somphospondylan *Wintonotitan Wattsi* (Dinosauria: Sauropoda:  
31 Titanosauriformes) from the mid-Cretaceous Winton Formation, Queensland, Australia.  
32  
33 *Papers in Palaeontology* **1**, 59–106. (doi:[10.1002/spp2.1004](https://doi.org/10.1002/spp2.1004))  
34  
35  
36  
37 58. Poropat SF *et al.* 2016 New Australian sauropods shed light on Cretaceous dinosaur  
38 palaeobiogeography. *Scientific Reports* **6**, 34467. (doi:[10.1038/srep34467](https://doi.org/10.1038/srep34467))  
39  
40  
41 59. Poropat SF, Upchurch P, Mannion PD, Hocknull SA, Kear BP, Sloan T, Sinapius GHK, Elliott  
42 DA. 2015 Revision of the sauropod dinosaur *Diamantinasaurus Matildae* Hocknull *et al.* 2009  
43 from the mid-Cretaceous of Australia: Implications for Gondwanan titanosauriform dispersal.  
44  
45 *Gondwana Research* **27**, 995–1033. (doi:[10.1016/j.gr.2014.03.014](https://doi.org/10.1016/j.gr.2014.03.014))  
46  
47  
48  
49 60. Sereno PC, Martinez RN, Wilson JA, Varricchio DJ, Alcober OA, Larsson HCE. 2008 Evidence  
50 for avian intrathoracic air sacs in a new predatory dinosaur from Argentina. *PLoS ONE* **3**,  
51 e3303. (doi:[10.1371/journal.pone.0003303](https://doi.org/10.1371/journal.pone.0003303))  
52  
53  
54  
55  
56  
57  
58  
59  
60

- 1  
2 61. Allain R, Xaisanavong T, Richir P, Khentavong B. 2012 The first definitive Asian  
3 spinosaurid (Dinosauria: Theropoda) from the early cretaceous of Laos. *Naturwissenschaften*  
4 **99**, 369–377. (doi:[10.1007/s00114-012-0911-7](https://doi.org/10.1007/s00114-012-0911-7))  
5  
6  
7  
8 62. O'Connor PM. 2007 The postcranial axial skeleton of *Majungasaurus Crenatissimus*  
9 (Theropoda: Abelisauridae) from the Late Cretaceous of Madagascar. *Journal of Vertebrate*  
10 *Paleontology* **27**, 127–163.  
11  
12  
13  
14 63. Carrano MT. 2007 The appendicular skeleton of *Majungasaurus Crenatissimus*  
15 (Theropoda: Abelisauridae) from the Late Cretaceous of Madagascar. *Journal of Vertebrate*  
16 *Paleontology* **27**, 163–179.  
17  
18  
19  
20 64. Brusatte SL, Benson RBJ, Hutt S. 2008 The osteology of *Neovenator Salerii* (Dinosauria:  
21 Theropoda) from the Wealden Group (Barremian) of the Isle of Wight. *Monograph of the*  
22 *Palaeontographical Society Series* **162**, 1–75.  
23  
24  
25  
26 65. Allain R, Chure DJ. 2002 *Poekilopleuron bucklandii*, the theropod dinosaur from the Middle  
27 Jurassic (Bathonian) of Normandy. *Palaeontology* **45**, 1107–1121. (doi:[10.1111/1475-](https://doi.org/10.1111/1475-4983.00277)  
28 [4983.00277](https://doi.org/10.1111/1475-4983.00277))  
29  
30  
31  
32 66. Méndez AH. 2012 The caudal vertebral series in abelisaurid dinosaurs. *Acta*  
33 *Palaeontologica Polonica* **59**, 99–107. (doi:[10.4202/app.2012.0095](https://doi.org/10.4202/app.2012.0095))  
34  
35  
36  
37 67. Madsen SK. 1976 *Allosaurus fragilis*: A revised osteology. *Utah Geological Survey Bulletin*  
38 **109**, 1–163.  
39  
40  
41 68. Sadleir RW, Barrett PM, Powell HP. 2008 The anatomy and systematics of  
42 *Eustreptospondylus Oxoniensis*. *Monograph of the Palaeontographical Society, London* **160**, 1–  
43 82.  
44  
45  
46  
47 69. Benson RB. 2008 New information on *Stokesosaurus*, a tyrannosauroid (Dinosauria:  
48 Theropoda) from North America and the United Kingdom. *Journal of vertebrate Paleontology*  
49 **28**, 732–750.  
50  
51  
52  
53  
54  
55  
56  
57  
58  
59  
60

- 1  
2 70. Brusatte SL, Carr TD, Norell MA. 2012 The osteology of *Alioramus*, a gracile and long-  
3 snouted tyrannosaurid (Dinosauria: Theropoda) from the Late Cretaceous of Mongolia.  
4 *Bulletin of the American Museum of Natural History*, 1–197. (doi:[10.1206/770.1](https://doi.org/10.1206/770.1))  
5  
6  
7  
8 71. Hendrickx C, Mateus O. 2014 *Torvosaurus gurneyi* n. sp., the largest terrestrial predator  
9 from Europe, and a proposed terminology of the maxilla anatomy in nonavian theropods.  
10 *PLOS ONE* **9**, e88905. (doi:[10.1371/journal.pone.0088905](https://doi.org/10.1371/journal.pone.0088905))  
11  
12  
13  
14 72. Benson RBJ. 2010 A description of *Megalosaurus Bucklandii* (Dinosauria: Theropoda) from  
15 the Bathonian of the UK and the relationships of Middle Jurassic theropods. *Zoological Journal*  
16 *of the Linnean Society* **158**, 882–935. (doi:[10.1111/j.1096-3642.2009.00569.x](https://doi.org/10.1111/j.1096-3642.2009.00569.x))  
17  
18  
19  
20 73. Harris JD. 1998 A reanalysis of *Acrocanthosaurus Atokensis*, its phylogenetic status, and  
21 paleobiogeographic implications, based on a new specimen from Texas. *New Mexico Museum*  
22 *of Natural History and Science Bulletin* **13**, 1–75.  
23  
24  
25  
26 74. Kobayashi Y, Barsbold R. 2005 Reexamination of a primitive ornithomimosaur,  
27 *Garudimimus Brevipes* Barsbold, 1981 (Dinosauria: Theropoda), from the Late Cretaceous of  
28 Mongolia. *Can. J. Earth Sci.* **42**, 1501–1521. (doi:[10.1139/e05-044](https://doi.org/10.1139/e05-044))  
29  
30  
31  
32 75. Stromer E. 1915 Ergebnisse der Forschungsreisen Prof. E. Stromers in den Wüsten  
33 Ägyptens. II. Wirbeltier-Reste der Baharije-Stufe (unterstes Cenoman). 3. Das Original des  
34 Theropoden *Spinosaurus Aegyptiacus* nov. gen., nov. spec. *Abhandlungen der Bayerischen*  
35 *Akademie der Wissenschaften, Mathematisch- naturwissenschaftliche Abteilung, Neue Folge* **28**,  
36 1–32.  
37  
38  
39  
40  
41  
42 76. Coria RA, Currie PJ. 2006 A new carcharodontosaurid (Dinosauria, Theropoda) from the  
43 Upper Cretaceous of Argentina. *Geodiversitas* **28**, 71–118.  
44  
45  
46 77. Rauhut OW. 2005 Osteology and relationships of a new theropod dinosaur from the  
47 Middle Jurassic of Patagonia. *Palaeontology* **48**, 87–110.  
48  
49  
50  
51 78. Charig AJ, Milner AC. 1997 *Baryonyx walkeri*, a fish-eating dinosaur from the Wealden of  
52 Surrey. *Bulletin of the Natural History Museum London* **53**, 11–70.  
53  
54  
55  
56  
57  
58  
59  
60

- 1  
2 79. Stromer E. 1931 Ergebnisse der Forschungsreisen Prof. E. Stromers in den Wüsten  
3 Ägyptens. II. Wirbeltierreste der Baharje-Stufe (unterstes Cenoman). 10. Ein Skelett-Rest von  
4 *Carcharodontosaurus* no. gen. *Abhandlungen der Bayerischen Akademie der Wissenschaften,*  
5 *Mathematisch- naturwissenschaftliche Abteilung, Neue Folge* **9**, 1–23.  
6  
7  
8  
9  
10 80. Welles SP. 1984 *Dilophosaurus wetherilli* (Dinosauria, Theropoda) osteology and  
11 comparisons. *Palaeontographica Abteilung A* **185**, 85–180.  
12  
13  
14 81. Canale JI, Novas FE, Pol D. 2013 Osteology and phylogenetic relationships of *Tyrannotitan*  
15 *Chubutensis* Novas, de Valais, Vickers-Rich and Rich, 2005 (Theropoda:  
16 Carcharodontosauridae) from the Lower Cretaceous of Patagonia, Argentina. *Historical*  
17 *Biology* **27**, 1–32. (doi:[10.1080/08912963.2013.861830](https://doi.org/10.1080/08912963.2013.861830))  
18  
19  
20  
21  
22 82. Coria RA, Currie PJ, Eberth D, Garrido A. 2002 Bird footprints from the Anacleto Formation  
23 (Late Cretaceous) in Neuquén Province, Argentina. *Ameghiniana* **39**, 1–11.  
24  
25  
26 83. Hedrick BP, Zanno LE, Wolfe DG, Dodson P. 2015 The slothful claw: Osteology and  
27 taphonomy of *Nothronychus Mckinleyi* and *N. Graffami* (Dinosauria: Theropoda) and  
28 anatomical considerations for derived therizinosaurids. *PloS one* **10**, e0129449.  
29  
30  
31  
32 84. Britt BB. 1993 Pneumatic postcrania in dinosaurs and other archosaurs. PhD Thesis,  
33 University of Calgary, Calgary, Alberta.  
34  
35  
36  
37 85. Carrano MT, Sampson SD. 2008 The phylogeny of Ceratosauria (Dinosauria: Theropoda).  
38 *Journal of Systematic Palaeontology* **6**, 183–236. (doi:[10.1017/S1477201907002246](https://doi.org/10.1017/S1477201907002246))  
39  
40  
41 86. Sues H-D, Averianov A. 2014 Dromaeosauridae (Dinosauria: Theropoda) from the Bissekty  
42 Formation (Upper Cretaceous: Turonian) of Uzbekistan and the phylogenetic position of  
43 *Itemirus Medullaris* Kurzanov, 1976. *Cretaceous Research* **51**, 225–240.  
44  
45  
46 (doi:[10.1016/j.cretres.2014.06.007](https://doi.org/10.1016/j.cretres.2014.06.007))  
47  
48  
49 87. Evers SW, Rauhut OW, Milner AC, McFeeters B, Allain R. 2015 A reappraisal of the  
50 morphology and systematic position of the theropod dinosaur *Sigilmassasaurus* from the  
51 ‘middle’ Cretaceous of Morocco. *PeerJ* **3**, e1323. (doi:[10.7717/peerj.1323](https://doi.org/10.7717/peerj.1323))  
52  
53  
54  
55  
56  
57  
58  
59  
60

- 1  
2 88. Coria RA, Currie PJ. 2016 A new megaraptoran dinosaur (Dinosauria, Theropoda,  
3 Megaraptoridae) from the Late Cretaceous of Patagonia. *PLOS ONE* **11**, e0157973.  
4 (doi:[10.1371/journal.pone.0157973](https://doi.org/10.1371/journal.pone.0157973))  
5  
6  
7  
8 89. Britt BB. 1991 Theropods of Dry Mesa Quarry (Morrison Formation, Late Jurassic),  
9 Colorado, with emphasis on the osteology of *Torvosaurus Tanneri*. *Brigham Young University*  
10 *Geology Studies* **37**, 1–72.  
11  
12  
13  
14 90. Xu X, Tan Q, Wang J, Zhao X, Tan L. 2007 A gigantic bird-like dinosaur from the Late  
15 Cretaceous of China. *Nature* **447**, 844–847. (doi:[10.1038/nature05849](https://doi.org/10.1038/nature05849))  
16  
17  
18  
19 91. Balanoff AM, Norell MA. 2012 Osteology of *Khaan Mckennai* (Oviraptorosauria:  
20 Theropoda). *Bulletin of the American Museum of Natural History* **372**, 1–77.  
21 (doi:[10.1206/803.1](https://doi.org/10.1206/803.1))  
22  
23  
24  
25 92. Benson RBJ, Butler RJ, Carrano MT, O'Connor PM. 2012 Air-filled postcranial bones in  
26 theropod dinosaurs: Physiological implications and the 'reptile'–bird transition. *Biological*  
27 *Reviews* **87**, 168–193. (doi:[10.1111/j.1469-185X.2011.00190.x](https://doi.org/10.1111/j.1469-185X.2011.00190.x))  
28  
29  
30  
31 93. O'Connor PM. 2006 Postcranial pneumaticity: An evaluation of soft-tissue influences on  
32 the postcranial skeleton and the reconstruction of pulmonary anatomy in archosaurs. *Journal*  
33 *of Morphology* **267**, 1199–1226. (doi:[10.1002/jmor.10470](https://doi.org/10.1002/jmor.10470))  
34  
35  
36  
37 94. Zhao X-J, Currie PJ. 1993 A large crested theropod from the Jurassic of Xinjiang, People's  
38 Republic of China. *Can. J. Earth Sci.* **30**, 2027–2036. (doi:[10.1139/e93-178](https://doi.org/10.1139/e93-178))  
39  
40  
41  
42 95. Kobayashi Y, Barsbold R. 2005 Anatomy of *Harpymimus Okladnikov* Barsbold and Perle  
43 1984 (Dinosauria; Theropoda) of Mongolia. In *The Carnivorous Dinosaurs* (ed K Carpenter),  
44 pp. 97–126. Bloomington: Indiana University Press.  
45  
46  
47  
48 96. Zhao X, Benson RBJ, Brusatte SL, Currie PJ. 2010 The postcranial skeleton of  
49 *Monolophosaurus Jiangi* (Dinosauria: Theropoda) from the Middle Jurassic of Xinjiang, China,  
50 and a review of Middle Jurassic Chinese theropods. *Geological Magazine* **147**, 13–27.  
51 (doi:[10.1017/S0016756809990240](https://doi.org/10.1017/S0016756809990240))  
52  
53  
54  
55  
56  
57  
58  
59  
60



- 1  
2 97. Frey E, Martill DM. 1995 A possible oviraptorosaurid theropod from the Santana  
3 Formation (Lower Cretaceous,? Albian) of Brazil. *Neues Jahrbuch fur Geologie und*  
4 *Palaontologie Monatshefte* **7**, 397–412.  
5  
6  
7  
8 98. Frankfurt NG, Chiappe LM. 1999 A possible oviraptorosaur from the Late Cretaceous of  
9 northwestern Argentina. *Journal of Vertebrate Paleontology* **19**, 101–105.  
10  
11 (doi:[10.1080/02724634.1999.10011126](https://doi.org/10.1080/02724634.1999.10011126))  
12  
13  
14 99. Aranciaga Rolando AM, Egli FB, Sales MAF, Martinelli AG, Canale JI, Ezcurra MD. 2018 A  
15 supposed Gondwanan oviraptorosaur from the Albian of Brazil represents the oldest South  
16 American megaraptoran. *Cretaceous Research* **84**, 107–119.  
17  
18 (doi:[10.1016/j.cretres.2017.10.019](https://doi.org/10.1016/j.cretres.2017.10.019))  
19  
20  
21  
22 100. Agnolin FL, Martinelli AG. 2007 Did oviraptorosaurs (Dinosauria; Theropoda) inhabit  
23 Argentina? *Cretaceous Research* **28**, 785–790. (doi:[10.1016/j.cretres.2006.10.006](https://doi.org/10.1016/j.cretres.2006.10.006))  
24  
25  
26  
27  
28  
29  
30  
31  
32  
33  
34  
35  
36  
37  
38  
39  
40  
41  
42  
43  
44  
45  
46  
47  
48  
49  
50  
51  
52  
53  
54  
55  
56  
57  
58  
59  
60



## **Appendix C**

### **Note to the Editor:**

In considering present and future comments regarding this manuscript, we would like to draw the Editor's attention to the uncharacteristically strong (in our opinion) defence Reviewer 1 has consistently given to his preferred phylogenetic hypotheses, the subject of which was never a key component of the research presented in this work. In addition, we would also like to remind and emphasise to the Editor that the two other reviewers who have provided comment on this manuscript at various stages have taken comparatively little issue with the use of any particular taxonomic framework, emphasising that the views of Reviewer 1 are not held by all researchers engaged in theropod taxonomy. As is detailed in the response below, we believe we have dealt with the ultimate cause of Reviewer 1's primary concerns by considering phylogenetic debates surrounding Megaraptora as unresolved, and using terms acceptable and interpretable under any given hypothesis. In the event that further issues are raised with respect to phylogenetic hypotheses as discussed in the present manuscript, we hope that the Editor will consider them in the context of an ongoing and unresolved problem within theropod phylogeny and the aforementioned neutral framing of our taxonomic discussion.

In this revision of the manuscript we have taken the opportunity to include an additional specimen of a theropod from Lightning Ridge that has recently come to our attention. This supplements the material already described and does not alter our conclusions.

### **Response to reviewers comments**

#### **Reviewer 1:**

1. As will be discussed in more detail below, the referral of LRF 3310–3312 has been modified to the more inclusive theropod clade Avetheropoda, which reflects certain ambiguities in the combination and number of identifiable characters as preserved. We believe that this obviates a statement in this comment that this manuscript makes novel claims about Australian Cretaceous theropod faunal composition. In addition, we more clearly outline our position with respect to the debate surrounding megaraptoran phylogenetic hypotheses, opting to use definitions that can be interpreted independent of any specific topology. As such, the manuscript now

no longer makes any additional claims, or offers any support for or against, any of the current phylogenetic, and by extension palaeobiogeographic, hypotheses pertaining to Megaraptora. Instead, the principal purpose of this manuscript is to illustrate, describe and discuss in a limited fashion new material pertaining to theropod dinosaurs, a group which is still poorly represented in Australia.

2. The phrasing of this sentence has been modified to reflect the predominance of abelisaurids in Cretaceous Patagonia and the proportion of carcharodontosaurids.
3. We have removed references to the terms “Carcharodontosauria” and “carcharodontosaurian(s)” that are specific to the phylogenetic hypothesis of Benson et al. (2010) in line with the suggestion offered. However, their removal does not imply tacit acceptance of either of the alternative hypotheses suggested by Reviewer 1, but instead reflects the present uncertainty of the phylogenetic placement of Megaraptora. In my revised Systematic Framework section, we briefly outline the debate surrounding various competing hypotheses of megaraptoran affinities and state my preference for using the composition of Megaraptora and Megaraptoridae as defined by Novas et al. (2013), which has remained relatively stable between all three current hypotheses, but not necessarily their preferred phylogenetic hypothesis. we consider this to be a conservative approach in the present situation, and is an attempt to ensure that the descriptions and discussions presented in this manuscript can remain relevant if and when the aforementioned controversies are resolved.
4. The sentence in the Systematic Framework section that prompted this statement has been removed and replaced with the aforementioned discussion of the various competing hypotheses for the placement of Megaraptora and our decision to use taxonomic descriptors that are ambivalent to any of the presently offered hypotheses. We strongly note that the present manuscript does not in any way attempt to make any substantial contribution to the debate as it stands; however, we will take this opportunity to respond to this comment. Reviewer 1 is correct that the Novas et al. (2013) dataset was more inclusive in its taxonomic scope than that of Benson et al. (2010). However, our principal concern with the Novas et al. (2013) dataset, as stated in my previous response, is that its sampling is considerably reduced in comparison to the two source datasets Reviewer 1 claims were unified in its construction (i.e., 61 unique genera in Benson et al. [2010] and Brusatte et al. [2010])

combined, as opposed to 44 unique genera in Novas et al. [2010]; 540 total characters Benson et al. [2010] and Brusatte et al. [2010] combined, with few shared characters, as opposed to 287 characters from Novas et al. [2013]). Consideration of all available evidence is of the utmost importance when assessing the robustness of any given phylogenetic hypothesis; this has in fact been demonstrated in the revised version of the Novas et al. (2013) dataset by Apesteguia et al. (2016), in which the addition of taxa and characters hypothesised a phylogenetic position of Megaraptora as the sister taxon of Coelurosauria, as opposed to Reviewer 1's favoured position within Tyrannosauroidea. In light of the present uncertainties as discussed above and in the revised manuscript, we believe that the strength of Reviewer 1's defence of his preferred hypothesis is premature and misplaced. Nonetheless, Novas et al. (2013) and Apesteguia et al. (2016) represent important contributions to the ongoing debate surrounding megaraptoran phylogenetics, but we maintain that an increase in both the sampling of characters and taxa presented in both datasets. that forms the basis for the phylogenetic hypotheses offered, is ultimately required if resolution is to be achieved.

5. We have relaxed our diagnosis of LRF 3310–3312 to the more inclusive clade Avetheropoda, which encompasses all the taxa to which Reviewer 1 has drawn comparisons in his comments. However, contrary to the position outlined in this comment, it would be improper to refer this material to Megaraptoridae as there are no recognisable autapomorphies present to support such a claim. The fact that megaraptorids thus far comprise a large percentage of the Australian Cretaceous theropod fauna is insufficient grounds for claiming that any theropod material found in Australia during this time interval must by default pertain to a megaraptorid.
6. Statements to this effect were inserted in the previous revision; these have now been augmented with passages mentioning the phylogenetic ambiguity involved in interpreting patterns of vertebral pneumatic composition in theropods.
7. Theses observation has been added to the discussions where appropriate.
8. The taxa listed here all fall within the theropod clade Avetheropoda, to which LRF 3310–3312 has now been assigned, albeit indeterminately.

9. and 10. See previous comments about the relaxing of the taxonomic status of LRF 3310–3312 to an indeterminate avetheropodan.

## Reviewer 2.

We thank reviewer 2 for his favourable comments to the manuscript under consideration. We have addressed the concerns outlined in his review and present them in this revised version.

1. As stated above, the Systematic Framework section has been revised, and potentially contentious passages have been removed and replaced with a discussion more clearly outlining the rationale for our hierarchical taxonomy. In addition, clades specific to particular phylogenetic hypotheses of Megaraptora (i.e., Neovenatoridae, Carcharodontosauridae) have been replaced with suitable alternatives.
2. We thank Reviewer 2 for bringing our attention to the extent of development of pneumaticity in the caudal vertebrae of *Aoniraptor*; this information has been incorporated into our discussion of LRF 3310, LRF 3311 and AM F112816.
